# Supplementary material for: Inducible mechanisms of disease tolerance provide an alternative strategy of acquired immunity to malaria
Source: eLife. 2021 Mar 23;10:e63838. doi: 10.7554/eLife.63838 (PMC7987336; doi:10.7554/eLife.63838)
Supplement: Supplementary file 2. — Bone marrow monocytes were flow-sorted from once-infected mice (AJ, memory, 70 days p.i.) and uninfected controls for chromatin immunoprecipitation (ChIP)seq; differences in their histone modification profiles were then quantified by calling differentially modified regions (DMR, annotated to the nearest gene). Shown is a list of all tolerised/specialised genes annotated with a DMR, ordered by peak score. [file elife-63838-supp2.xlsx]

## Sheet: H3K27ac
H3K27ac
	Gene.Name	Chr	Start	End	Peak.Score	Focus.Ratio.Region.Size	Detailed.Annotation	Gene.Type	Distance.to.TSS	Nearest.PromoterID	Entrez.ID	Nearest.Unigene
1	Zdhhc21	4	82866346	82866846	7.25	500	Intergenic	protein_coding	-6638	ENSMUST00000107239	ENSMUSG00000028403	ENSMUST00000139401
2	Abtb2	2	103603582	103604082	7.1	500	protein_coding-intron (ENSMUST00000076212, intron 1 of 16)	protein_coding	37522	ENSMUST00000076212	ENSMUSG00000032724	ENSMUST00000076212
3	Vegfa	17	46012913	46013539	6.82	626	Intergenic	protein_coding	8146	ENSMUST00000143985	ENSMUSG00000023951	ENSMUST00000150327
4	Pola1	X	93416292	93417239	6.67	947	protein_coding-intron (ENSMUST00000006856, intron 35 of 36)	protein_coding	74181	ENSMUST00000142479	ENSMUSG00000006678	ENSMUST00000006856
5	Csl	10	99761549	99762369	6.1	820	lncRNA-exon (ENSMUST00000217945, exon 2 of 5)	protein_coding	-2301	ENSMUST00000056085	ENSMUSG00000046934	ENSMUST00000056085
6	Neto2	8	85694382	85695009	6.04	627	protein_coding-intron (ENSMUST00000209479, intron 1 of 8)	protein_coding	-3686	ENSMUST00000209259	ENSMUSG00000036902	ENSMUST00000209479
7	Flot1	17	35824471	35824971	6.01	500	protein_coding-TTS (ENSMUST00000174227)	protein_coding	725	ENSMUST00000173337	ENSMUSG00000059714	ENSMUST00000174297
8	Ldlr	9	21732865	21733499	5.86	634	protein_coding-intron (ENSMUST00000034713, intron 3 of 17)	protein_coding	-2925	ENSMUST00000217613	ENSMUSG00000032193	ENSMUST00000215917
9	Pprc1	19	46070209	46070860	5.84	651	protein_coding-intron (ENSMUST00000062322, intron 9 of 13)	protein_coding	-1220	ENSMUST00000146882	ENSMUSG00000055491	ENSMUST00000099392
10	Epha7	4	28770147	28770774	5.83	627	Intergenic	protein_coding	-42671	ENSMUST00000029964	ENSMUSG00000028289	ENSMUST00000080934
11	Plcb2	2	118729876	118730376	5.67	500	Intergenic	protein_coding	-1688	ENSMUST00000102524	ENSMUSG00000040061	ENSMUST00000006415
12	Ube2f	1	91252511	91253011	5.67	500	protein_coding-intron (ENSMUST00000059743, intron 1 of 10)	protein_coding	2105	ENSMUST00000191533	ENSMUSG00000034343	ENSMUST00000187494
13	Rasal3	17	32395232	32395944	5.52	712	protein_coding-promoter-TSS (ENSMUST00000143808)	protein_coding	-217	ENSMUST00000143808	ENSMUSG00000052142	ENSMUST00000135968
14	Ptch2	4	117106680	117107306	5.5	626	protein_coding-TTS (ENSMUST00000156989)	protein_coding	1755	ENSMUST00000137209	ENSMUSG00000028681	ENSMUST00000030443
15	Cd81	7	143043476	143043976	5.48	500	lncRNA-intron (ENSMUST00000131129, intron 2 of 4)	protein_coding	-9013	ENSMUST00000037941	ENSMUSG00000037706	ENSMUST00000208278
16	B230118H07Rik	2	101613445	101614071	5.45	626	protein_coding-intron (ENSMUST00000090513, intron 1 of 6)	protein_coding	-3202	ENSMUST00000136601	ENSMUSG00000027165	ENSMUST00000132640
17	Trpm4	7	45300223	45300723	5.44	500	Intergenic	protein_coding	4731	ENSMUST00000210639	ENSMUSG00000038260	ENSMUST00000042194
18	Pcyox1l	18	61710828	61711454	5.38	626	Intergenic	protein_coding	-3506	ENSMUST00000154763	ENSMUSG00000024579	ENSMUST00000195229
19	Dapk2	9	66230602	66231102	5.27	500	protein_coding-intron (ENSMUST00000034944, intron 3 of 11)	protein_coding	10105	ENSMUST00000132987	ENSMUSG00000032380	ENSMUST00000129442
20	Ankib1	5	3712077	3712741	5.2	664	protein_coding-intron (ENSMUST00000043551, intron 11 of 19)	protein_coding	-10277	ENSMUST00000199043	ENSMUSG00000040351	ENSMUST00000200052
21	Pnpt1	11	29117103	29117750	5.2	647	Intergenic	protein_coding	-13318	ENSMUST00000154924	ENSMUSG00000020464	ENSMUST00000148173
22	Cenpe	3	135213664	135214164	5.2	500	protein_coding-intron (ENSMUST00000062893, intron 1 of 45)	protein_coding	1377	ENSMUST00000062893	ENSMUSG00000045328	ENSMUST00000199497
23	Dnase1l3	14	7982115	7982743	5.18	628	protein_coding-intron (ENSMUST00000026315, intron 4 of 7)	protein_coding	-5207	ENSMUST00000145234	ENSMUSG00000025279	ENSMUST00000145234
24	Adam3	8	24686528	24687231	5.17	703	protein_coding-intron (ENSMUST00000033958, intron 18 of 21)	protein_coding	1084	ENSMUST00000167431	ENSMUSG00000031553	ENSMUST00000166986
25	Eif2s2	2	154868784	154869423	5.17	639	protein_coding-intron (ENSMUST00000137333, intron 1 of 4)	protein_coding	23679	ENSMUST00000166171	ENSMUSG00000074656	ENSMUST00000099173
26	Cp	3	19967887	19968387	5.15	500	protein_coding-exon (ENSMUST00000003714, exon 4 of 20)	protein_coding	-1705	ENSMUST00000150264	ENSMUSG00000003617	ENSMUST00000129135
27	Myoz1	14	20647993	20648493	5.1	500	protein_coding-TTS (ENSMUST00000090469)	protein_coding	2475	ENSMUST00000224472	ENSMUSG00000068697	ENSMUST00000225231
28	Cux2	5	121988617	121989326	4.97	709	protein_coding-intron (ENSMUST00000086317, intron 2 of 22)	protein_coding	13373	ENSMUST00000134326	ENSMUSG00000042589	ENSMUST00000197179
29	Fmnl3	15	99370582	99371082	4.92	500	protein_coding-promoter-TSS (ENSMUST00000081224)	protein_coding	-350	ENSMUST00000088233	ENSMUSG00000023008	ENSMUST00000088233
30	Zdhhc2	8	40459368	40460006	4.88	638	protein_coding-intron (ENSMUST00000049389, intron 6 of 12)	protein_coding	35583	ENSMUST00000168799	ENSMUSG00000039470	ENSMUST00000128166
31	Tada2a	11	84098616	84099116	4.82	500	protein_coding-intron (ENSMUST00000018795, intron 8 of 15)	protein_coding	-5012	ENSMUST00000141852	ENSMUSG00000018651	ENSMUST00000134994
32	Terf1	1	15818573	15819223	4.81	650	protein_coding-intron (ENSMUST00000027057, intron 3 of 8)	protein_coding	11257	ENSMUST00000188684	ENSMUSG00000025925	ENSMUST00000188684
33	Tnip3	6	65533129	65533629	4.81	500	protein_coding-intron (ENSMUST00000212375, intron 1 of 10)	protein_coding	7994	ENSMUST00000212375	ENSMUSG00000044162	ENSMUST00000204241
34	Rttn	18	89109756	89110398	4.79	642	protein_coding-intron (ENSMUST00000023828, intron 42 of 48)	protein_coding	1970	ENSMUST00000237196	ENSMUSG00000023066	ENSMUST00000236313
35	Uchl5	1	143797873	143798500	4.77	627	protein_coding-intron (ENSMUST00000018333, intron 7 of 10)	protein_coding	3469	ENSMUST00000185539	ENSMUSG00000018189	ENSMUST00000185742
36	Evl	12	108627950	108628450	4.71	500	protein_coding-intron (ENSMUST00000021689, intron 1 of 13)	protein_coding	-7510	ENSMUST00000223109	ENSMUSG00000021262	ENSMUST00000223109
37	BC049762	11	51247835	51248335	4.65	500	Intergenic	protein_coding	8179	ENSMUST00000231433	ENSMUSG00000045942	ENSMUST00000054226
38	Trim37	11	87213626	87214126	4.65	500	protein_coding-intron (ENSMUST00000041282, intron 22 of 23)	protein_coding	23802	ENSMUST00000154138	ENSMUSG00000018548	ENSMUST00000041282
39	Esr1	10	4983449	4983949	4.63	500	protein_coding-intron (ENSMUST00000067086, intron 7 of 8)	protein_coding	47173	ENSMUST00000137012	ENSMUSG00000019768	ENSMUST00000105590
40	Cdk5rap2	4	70319189	70319826	4.58	637	protein_coding-intron (ENSMUST00000076541, intron 9 of 33)	protein_coding	-54827	ENSMUST00000138561	ENSMUSG00000039298	ENSMUST00000126416
41	Naa10	X	73918003	73918503	4.58	500	protein_coding-exon (ENSMUST00000143076, exon 5 of 5)	protein_coding	1609	ENSMUST00000139105	ENSMUSG00000031388	ENSMUST00000096316
42	Nampt	12	32833758	32834258	4.58	500	protein_coding-intron (ENSMUST00000020886, intron 3 of 10)	protein_coding	13207	ENSMUST00000218491	ENSMUSG00000020572	ENSMUST00000020886
43	Rnase10	14	51015187	51015687	4.56	500	Intergenic	protein_coding	7508	ENSMUST00000022424	ENSMUSG00000021872	ENSMUST00000164632
44	Hipk2	6	38827283	38827783	4.56	500	protein_coding-intron (ENSMUST00000114855, intron 1 of 1)	protein_coding	-9187	ENSMUST00000159894	ENSMUSG00000061436	ENSMUST00000114855
45	Rfc1	5	65286954	65287454	4.54	500	protein_coding-intron (ENSMUST00000172732, intron 11 of 24)	protein_coding	-13537	ENSMUST00000205063	ENSMUSG00000029191	ENSMUST00000172732
46	Tmem167	13	90090531	90091031	4.54	500	protein_coding-intron (ENSMUST00000012566, intron 1 of 3)	protein_coding	1019	ENSMUST00000012566	ENSMUSG00000012422	ENSMUST00000161568
47	Arid5b	10	68258281	68258781	4.48	500	protein_coding-intron (ENSMUST00000020106, intron 2 of 10)	protein_coding	20190	ENSMUST00000020106	ENSMUSG00000019947	ENSMUST00000218425
48	Tnip1	11	54970124	54970624	4.48	500	Intergenic	protein_coding	-7457	ENSMUST00000102731	ENSMUSG00000020400	ENSMUST00000108889
49	Abca13	11	9344571	9345071	4.47	500	protein_coding-intron (ENSMUST00000042740, intron 27 of 61)	protein_coding	151370	ENSMUST00000151522	ENSMUSG00000004668	ENSMUST00000151522
50	Plxdc2	2	16522305	16522805	4.45	500	protein_coding-intron (ENSMUST00000028081, intron 2 of 13)	protein_coding	-116141	ENSMUST00000126173	ENSMUSG00000026748	ENSMUST00000114703
51	Mast2	4	116396194	116396694	4.4	500	protein_coding-intron (ENSMUST00000003908, intron 3 of 28)	protein_coding	9542	ENSMUST00000123072	ENSMUSG00000003810	ENSMUST00000123761
52	Rapgef2	3	79134937	79135437	4.39	500	protein_coding-intron (ENSMUST00000118100, intron 1 of 23)	protein_coding	9790	ENSMUST00000118100	ENSMUSG00000062232	ENSMUST00000152275
53	Cenpk	13	104260555	104261055	4.37	500	Intergenic	protein_coding	22536	ENSMUST00000224098	ENSMUSG00000021714	ENSMUST00000224098
54	Nav2	7	49000998	49001498	4.37	500	protein_coding-intron (ENSMUST00000183659, intron 2 of 39)	protein_coding	42151	ENSMUST00000183659	ENSMUSG00000052512	ENSMUST00000184336
55	Gpld1	13	24945467	24945967	4.36	500	protein_coding-intron (ENSMUST00000021773, intron 2 of 25)	protein_coding	2565	ENSMUST00000021773	ENSMUSG00000021340	ENSMUST00000223873
56	Gtf2ird1	5	134453355	134453855	4.35	500	protein_coding-intron (ENSMUST00000073161, intron 1 of 30)	protein_coding	2346	ENSMUST00000201647	ENSMUSG00000023079	ENSMUST00000111245
57	Cntn3	6	102608760	102609260	4.33	500	Intergenic	protein_coding	-35909	ENSMUST00000203619	ENSMUSG00000030075	ENSMUST00000203619
58	Lin9	1	180667281	180667781	4.33	500	protein_coding-intron (ENSMUST00000085804, intron 8 of 11)	protein_coding	6054	ENSMUST00000194638	ENSMUSG00000058729	ENSMUST00000192561
59	Rbmx2	X	48777269	48777769	4.29	500	Intergenic	protein_coding	71339	ENSMUST00000139150	ENSMUSG00000031107	ENSMUST00000033433
60	Bcl2l15	3	103842161	103842661	4.26	500	protein_coding-intron (ENSMUST00000106822, intron 3 of 3)	protein_coding	-4413	ENSMUST00000199772	ENSMUSG00000044165	ENSMUST00000062945
61	Ogn	13	49604827	49605327	4.26	500	protein_coding-intron (ENSMUST00000021818, intron 5 of 7)	protein_coding	-2969	ENSMUST00000021822	ENSMUSG00000021390	ENSMUST00000021822
62	Atg10	13	91025135	91025635	4.24	500	protein_coding-intron (ENSMUST00000022119, intron 4 of 7)	protein_coding	100225	ENSMUST00000223729	ENSMUSG00000021619	ENSMUST00000022119
63	Casz1	4	148854696	148855196	4.24	500	protein_coding-intron (ENSMUST00000094464, intron 2 of 15)	protein_coding	-34435	ENSMUST00000140617	ENSMUSG00000028977	ENSMUST00000239035
64	Picalm	7	90172515	90173015	4.22	500	protein_coding-intron (ENSMUST00000049537, intron 7 of 20)	protein_coding	515	ENSMUST00000208089	ENSMUSG00000039361	ENSMUST00000208089
65	Snx7	3	117769321	117769821	4.22	500	Intergenic	protein_coding	61703	ENSMUST00000196421	ENSMUSG00000028007	ENSMUST00000169812
66	Nphp4	4	152466293	152466793	4.22	500	protein_coding-intron (ENSMUST00000030768, intron 1 of 14)	protein_coding	-10163	ENSMUST00000142027	ENSMUSG00000039577	ENSMUST00000123635
67	Gfod1	13	43314088	43314588	4.2	500	Intergenic	protein_coding	-10166	ENSMUST00000055341	ENSMUSG00000051335	ENSMUST00000055341
68	Rhbdf2	11	116625654	116626154	4.2	500	protein_coding-intron (ENSMUST00000103028, intron 1 of 18)	protein_coding	1115	ENSMUST00000103028	ENSMUSG00000020806	ENSMUST00000103028
69	Dthd1	5	63189464	63189964	4.18	500	Intergenic	protein_coding	375891	ENSMUST00000170704	ENSMUSG00000090326	ENSMUST00000170704
70	Mertk	2	128711999	128712499	4.18	500	protein_coding-intron (ENSMUST00000014505, intron 1 of 18)	protein_coding	13293	ENSMUST00000014505	ENSMUSG00000014361	ENSMUST00000014505
71	Nudt3	17	27596437	27596937	4.16	500	protein_coding-exon (ENSMUST00000146321, exon 2 of 2)	protein_coding	528	ENSMUST00000231742	ENSMUSG00000024213	ENSMUST00000176876
72	Smc6	12	11290974	11291474	4.15	500	protein_coding-promoter-TSS (ENSMUST00000217930)	protein_coding	455	ENSMUST00000220289	ENSMUSG00000020608	ENSMUST00000219041
73	Anxa4	6	86818816	86819316	4.11	500	Intergenic	protein_coding	-25482	ENSMUST00000001187	ENSMUSG00000029994	ENSMUST00000155456
74	Tsen2	6	115578973	115579473	4.11	500	protein_coding-TTS (ENSMUST00000040234)	protein_coding	4775	ENSMUST00000143520	ENSMUSG00000042389	ENSMUST00000040234
75	Filip1	9	79949576	79950076	4.09	500	protein_coding-intron (ENSMUST00000093811, intron 1 of 5)	protein_coding	12207	ENSMUST00000172973	ENSMUSG00000034898	ENSMUST00000172973
76	Erc1	6	119790667	119791167	4.09	500	protein_coding-intron (ENSMUST00000032279, intron 2 of 18)	protein_coding	5997	ENSMUST00000183872	ENSMUSG00000030172	ENSMUST00000184838
77	Tcf7l2	19	55905021	55905521	4.09	500	protein_coding-intron (ENSMUST00000041717, intron 4 of 11)	protein_coding	6962	ENSMUST00000148666	ENSMUSG00000024985	ENSMUST00000041717
78	Ccdc34	2	110044224	110044724	4.06	500	protein_coding-exon (ENSMUST00000028580, exon 6 of 6)	protein_coding	3579	ENSMUST00000155110	ENSMUSG00000027160	ENSMUST00000155110
79	Ubtd1	19	42010322	42010822	4.05	500	protein_coding-intron (ENSMUST00000026170, intron 1 of 2)	protein_coding	-6577	ENSMUST00000237817	ENSMUSG00000025171	ENSMUST00000026170
80	Crem	18	3348761	3349261	4.04	500	lncRNA-intron (ENSMUST00000181558, intron 1 of 1)	protein_coding	-11263	ENSMUST00000154470	ENSMUSG00000063889	ENSMUST00000142690
81	Pde4d	13	108983642	108984142	4.04	500	protein_coding-intron (ENSMUST00000122041, intron 2 of 16)	protein_coding	123726	ENSMUST00000177907	ENSMUSG00000021699	ENSMUST00000129374
82	Arhgef6	X	57355804	57356304	4.04	500	Intergenic	protein_coding	-17325	ENSMUST00000033468	ENSMUSG00000031133	ENSMUST00000175900
83	Camk2d	3	126806947	126807447	4.04	500	protein_coding-promoter-TSS (ENSMUST00000198637)	protein_coding	35	ENSMUST00000198637	ENSMUSG00000053819	ENSMUST00000131156
84	Gbe1	16	70551367	70551867	4.04	500	protein_coding-intron (ENSMUST00000023393, intron 14 of 16)	protein_coding	-9377	ENSMUST00000169432	ENSMUSG00000022707	ENSMUST00000169432
85	Mctp2	7	72073624	72074124	4.04	500	Intergenic	protein_coding	36709	ENSMUST00000206466	ENSMUSG00000032776	ENSMUST00000205410
86	Rasgef1c	11	49923087	49923587	4.04	500	protein_coding-intron (ENSMUST00000063444, intron 1 of 13)	protein_coding	21176	ENSMUST00000063444	ENSMUSG00000020374	ENSMUST00000109172
87	Snx2	18	53170140	53170640	4.04	500	Intergenic	protein_coding	-5926	ENSMUST00000037850	ENSMUSG00000034484	ENSMUST00000236911
88	Nasp	4	116613165	116613665	4.02	500	protein_coding-intron (ENSMUST00000030456, intron 5 of 15)	protein_coding	-7167	ENSMUST00000155398	ENSMUSG00000028693	ENSMUST00000155398
89	Rgl1	1	152588813	152589313	4.02	500	protein_coding-intron (ENSMUST00000027760, intron 2 of 17)	protein_coding	3696	ENSMUST00000128251	ENSMUSG00000026482	ENSMUST00000128251
90	Apool	X	112350887	112351387	3.99	500	protein_coding-intron (ENSMUST00000026599, intron 4 of 8)	protein_coding	39771	ENSMUST00000113415	ENSMUSG00000025525	ENSMUST00000154378
91	Fbxw17	13	50395224	50395724	3.99	500	lncRNA-intron (ENSMUST00000185962, intron 1 of 1)	protein_coding	-22390	ENSMUST00000046974	ENSMUSG00000037816	ENSMUST00000176772
92	Haus3	5	34163121	34163621	3.99	500	snRNA-TTS (ENSMUST00000104266)	protein_coding	341	ENSMUST00000201042	ENSMUSG00000079555	ENSMUST00000201042
93	Mpp7	18	7614238	7614738	3.99	500	protein_coding-intron (ENSMUST00000115869, intron 1 of 16)	protein_coding	-5506	ENSMUST00000234510	ENSMUSG00000057440	ENSMUST00000235093
94	Ppp1cb	5	32490516	32491016	3.99	500	protein_coding-intron (ENSMUST00000015100, intron 7 of 7)	protein_coding	4796	ENSMUST00000201880	ENSMUSG00000014956	ENSMUST00000201880
95	Arap2	5	62573281	62573781	3.97	500	Intergenic	protein_coding	38843	ENSMUST00000160620	ENSMUSG00000037999	ENSMUST00000159470
96	BC052040	2	115608213	115608713	3.95	500	protein_coding-intron (ENSMUST00000110918, intron 1 of 10)	protein_coding	26662	ENSMUST00000147968	ENSMUSG00000040282	ENSMUST00000166472
97	Prune2	19	17191023	17191523	3.95	500	protein_coding-intron (ENSMUST00000087689, intron 11 of 19)	protein_coding	-16978	ENSMUST00000225838	ENSMUSG00000039126	ENSMUST00000087689
98	Fmnl2	2	52957542	52958042	3.94	500	protein_coding-intron (ENSMUST00000049483, intron 1 of 26)	protein_coding	99924	ENSMUST00000050719	ENSMUSG00000036053	ENSMUST00000090952
99	Lrp12	15	39922807	39923307	3.94	500	protein_coding-intron (ENSMUST00000022916, intron 1 of 6)	protein_coding	20633	ENSMUST00000228575	ENSMUSG00000022305	ENSMUST00000110305
100	Zfp281	1	136645472	136645972	3.94	500	Intergenic	protein_coding	20821	ENSMUST00000112046	ENSMUSG00000041483	ENSMUST00000047734
101	Phf11	14	59247955	59248634	3.93	679	unprocessed_pseudogene-intron (ENSMUST00000224042, intron 3 of 5)	unprocessed_pseudogene	11886	ENSMUST00000224042	ENSMUSG00000090881	ENSMUST00000224042
102	Taf4b	18	14798426	14798926	3.9	500	protein_coding-intron (ENSMUST00000169862, intron 2 of 14)	protein_coding	15431	ENSMUST00000169862	ENSMUSG00000054321	ENSMUST00000234789
103	Gtse1	15	85847436	85847936	3.9	500	protein_coding-intron (ENSMUST00000133158, intron 8 of 12)	protein_coding	-12059	ENSMUST00000170629	ENSMUSG00000022385	ENSMUST00000170629
104	Jam3	9	27154738	27155238	3.9	500	protein_coding-intron (ENSMUST00000034472, intron 1 of 8)	protein_coding	405	ENSMUST00000034472	ENSMUSG00000031990	ENSMUST00000034472
105	Lpin2	17	71238237	71238737	3.88	500	protein_coding-promoter-TSS (ENSMUST00000140150)	protein_coding	-175	ENSMUST00000140150	ENSMUSG00000024052	ENSMUST00000126681
106	Mllt3	4	87921309	87921809	3.86	500	protein_coding-intron (ENSMUST00000078090, intron 2 of 10)	protein_coding	-47017	ENSMUST00000134555	ENSMUSG00000028496	ENSMUST00000128930
107	Tnr	1	159837255	159837755	3.86	500	protein_coding-intron (ENSMUST00000111669, intron 1 of 21)	protein_coding	-12892	ENSMUST00000192457	ENSMUSG00000015829	ENSMUST00000111669
108	Dab2ip	2	35577342	35577842	3.86	500	protein_coding-intron (ENSMUST00000112986, intron 1 of 16)	protein_coding	-3468	ENSMUST00000112987	ENSMUSG00000026883	ENSMUST00000145698
109	Krt18	15	102032516	102033016	3.86	500	protein_coding-TTS (ENSMUST00000023803)	protein_coding	4586	ENSMUST00000023803	ENSMUSG00000023043	ENSMUST00000023803
110	Tubg1	11	101123359	101123859	3.84	500	protein_coding-promoter-TSS (ENSMUST00000137844)	protein_coding	-891	ENSMUST00000137844	ENSMUSG00000035198	ENSMUST00000137844
111	Ccdc90b	7	92514663	92515163	3.81	500	Intergenic	protein_coding	-46236	ENSMUST00000032842	ENSMUSG00000030613	ENSMUST00000153776
112	Haus5	7	30666597	30667097	3.81	500	Intergenic	protein_coding	-1853	ENSMUST00000019697	ENSMUSG00000078762	ENSMUST00000132982
113	Stx3	19	11821755	11822255	3.81	500	Intergenic	protein_coding	-2602	ENSMUST00000047698	ENSMUSG00000041488	ENSMUST00000209304
114	Acsm3	7	119772261	119772761	3.79	500	protein_coding-intron (ENSMUST00000063770, intron 4 of 14)	protein_coding	-2033	ENSMUST00000149766	ENSMUSG00000030935	ENSMUST00000154828
115	Sfmbt2	2	10372835	10373335	3.79	500	protein_coding-intron (ENSMUST00000041105, intron 1 of 22)	protein_coding	635	ENSMUST00000041105	ENSMUSG00000061186	ENSMUST00000145398
116	Cdan1	2	120778376	120778876	3.77	500	protein_coding-intron (ENSMUST00000028740, intron 7 of 15)	protein_coding	-47108	ENSMUST00000110700	ENSMUSG00000027284	ENSMUST00000150860
117	Ica1	6	8823570	8824070	3.77	500	Intergenic	protein_coding	-45332	ENSMUST00000135113	ENSMUSG00000062995	ENSMUST00000126430
118	Prkcq	2	11152672	11153172	3.77	500	Intergenic	protein_coding	-19186	ENSMUST00000028118	ENSMUSG00000026778	ENSMUST00000114853
119	Stard4	18	33284170	33284670	3.77	500	Intergenic	protein_coding	-70558	ENSMUST00000025236	ENSMUSG00000024378	ENSMUST00000141617
120	Ift172	5	31264606	31265106	3.77	500	protein_coding-promoter-TSS (ENSMUST00000201953)	protein_coding	-935	ENSMUST00000201953	ENSMUSG00000038564	ENSMUST00000202410
121	Oas1g	5	120879024	120879524	3.77	500	protein_coding-exon (ENSMUST00000086368, exon 4 of 7)	protein_coding	329	ENSMUST00000161809	ENSMUSG00000066861	ENSMUST00000086368
122	Gramd1b	9	40317260	40317760	3.75	500	protein_coding-TTS (ENSMUST00000137189)	protein_coding	3410	ENSMUST00000239052	ENSMUSG00000040111	ENSMUST00000239052
123	Top2a	11	98990695	98991195	3.75	500	Intergenic	protein_coding	4425	ENSMUST00000139460	ENSMUSG00000020914	ENSMUST00000129777
124	Bub1b	2	118633226	118633726	3.73	500	protein_coding-intron (ENSMUST00000038341, intron 18 of 22)	protein_coding	1936	ENSMUST00000126013	ENSMUSG00000040084	ENSMUST00000130512
125	Tet1	10	62812882	62813382	3.73	500	protein_coding-TTS (ENSMUST00000173087)	protein_coding	1407	ENSMUST00000173087	ENSMUSG00000047146	ENSMUST00000218438
126	Chl1	6	103489392	103489892	3.72	500	Intergenic	protein_coding	-20944	ENSMUST00000203912	ENSMUSG00000030077	ENSMUST00000203912
127	Fancb	X	164983262	164983762	3.72	500	protein_coding-intron (ENSMUST00000057150, intron 2 of 8)	protein_coding	2800	ENSMUST00000057150	ENSMUSG00000047757	ENSMUST00000057150
128	Ltbp1	17	75018209	75018709	3.72	500	protein_coding-intron (ENSMUST00000001927, intron 2 of 33)	protein_coding	12165	ENSMUST00000146839	ENSMUSG00000001870	ENSMUST00000234008
129	Neil3	8	53678903	53679403	3.72	500	Intergenic	protein_coding	-40088	ENSMUST00000047768	ENSMUSG00000039396	ENSMUST00000047768
130	Dbf4	5	8408470	8408970	3.7	500	protein_coding-intron (ENSMUST00000002368, intron 4 of 11)	protein_coding	-3480	ENSMUST00000197442	ENSMUSG00000002297	ENSMUST00000166364
131	Gbp9	5	105083953	105084453	3.7	500	protein_coding-intron (ENSMUST00000031235, intron 1 of 9)	protein_coding	-1440	ENSMUST00000199453	ENSMUSG00000029298	ENSMUST00000031238
132	Mttp	3	138159766	138160266	3.7	500	protein_coding-TTS (ENSMUST00000040321)	protein_coding	-15048	ENSMUST00000197680	ENSMUSG00000028158	ENSMUST00000029805
133	Dusp10	1	184050531	184051031	3.69	500	protein_coding-intron (ENSMUST00000048655, intron 2 of 3)	protein_coding	16400	ENSMUST00000048655	ENSMUSG00000039384	ENSMUST00000048655
134	Slco3a1	7	74558845	74559345	3.68	500	Intergenic	protein_coding	-4315	ENSMUST00000107453	ENSMUSG00000025790	ENSMUST00000129292
135	Macrod2	2	141463136	141463636	3.68	500	protein_coding-intron (ENSMUST00000078027, intron 5 of 17)	protein_coding	-92290	ENSMUST00000138786	ENSMUSG00000068205	ENSMUST00000124403
136	Zbtb32	7	30602403	30602903	3.68	500	protein_coding-TTS (ENSMUST00000006476)	protein_coding	-3744	ENSMUST00000144532	ENSMUSG00000006310	ENSMUST00000108150
137	Chka	19	3884432	3884932	3.67	500	protein_coding-TTS (ENSMUST00000146463)	protein_coding	-7049	ENSMUST00000125013	ENSMUSG00000024843	ENSMUST00000128694
138	Kcnab1	3	65264421	65264921	3.67	500	protein_coding-intron (ENSMUST00000049230, intron 1 of 13)	protein_coding	11243	ENSMUST00000161979	ENSMUSG00000027827	ENSMUST00000160136
139	Rasgrp1	2	117320493	117320993	3.67	500	protein_coding-intron (ENSMUST00000102534, intron 2 of 16)	protein_coding	21966	ENSMUST00000174770	ENSMUSG00000027347	ENSMUST00000110898
140	Adamts3	5	89947302	89947802	3.65	500	Intergenic	protein_coding	-64218	ENSMUST00000198151	ENSMUSG00000043635	ENSMUST00000198151
141	Stag3	5	138289028	138289528	3.65	500	protein_coding-exon (ENSMUST00000048028, exon 5 of 34)	protein_coding	8722	ENSMUST00000161691	ENSMUSG00000036928	ENSMUST00000161113
142	Tes	6	17116084	17116584	3.65	500	lncRNA-intron (ENSMUST00000150251, intron 1 of 1)	protein_coding	51110	ENSMUST00000076654	ENSMUSG00000029552	ENSMUST00000154266
143	Capg	6	72542240	72542740	3.65	500	Intergenic	protein_coding	-1901	ENSMUST00000071044	ENSMUSG00000056737	ENSMUST00000114071
144	Ifi203	1	173959740	173960240	3.65	500	Intergenic	protein_coding	-17318	ENSMUST00000156895	ENSMUSG00000039997	ENSMUST00000156895
145	Mad1l1	5	140241481	140241981	3.65	500	protein_coding-intron (ENSMUST00000031534, intron 10 of 17)	protein_coding	20834	ENSMUST00000132832	ENSMUSG00000029554	ENSMUST00000110829
146	Tns3	11	8426384	8426884	3.63	500	Intergenic	protein_coding	42041	ENSMUST00000129074	ENSMUSG00000020422	ENSMUST00000134823
147	Arl6	16	59737795	59738295	3.63	500	protein_coding-intron (ENSMUST00000068860, intron 14 of 17)	protein_coding	-98654	ENSMUST00000099646	ENSMUSG00000022722	ENSMUST00000149797
148	Cndp2	18	84691472	84691972	3.63	500	Intergenic	protein_coding	-6020	ENSMUST00000025546	ENSMUSG00000024644	ENSMUST00000236415
149	Kif2c	4	117171652	117172152	3.62	500	protein_coding-intron (ENSMUST00000065896, intron 7 of 19)	protein_coding	-6492	ENSMUST00000132868	ENSMUSG00000028678	ENSMUST00000142205
150	Pwwp2b	7	139243991	139244491	3.62	500	Intergenic	protein_coding	-4241	ENSMUST00000093993	ENSMUSG00000060260	ENSMUST00000209721
151	Tnk2	16	32635401	32635901	3.62	500	Intergenic	protein_coding	-8223	ENSMUST00000145627	ENSMUSG00000022791	ENSMUST00000150383
152	Dusp16	6	134771852	134772352	3.61	500	protein_coding-intron (ENSMUST00000100857, intron 1 of 6)	protein_coding	-11002	ENSMUST00000204083	ENSMUSG00000030203	ENSMUST00000204083
153	Klf5	14	99313784	99314284	3.61	500	protein_coding-exon (ENSMUST00000005279, exon 4 of 4)	protein_coding	14880	ENSMUST00000226784	ENSMUSG00000005148	ENSMUST00000226784
154	Bcan	3	87996287	87996787	3.6	500	protein_coding-promoter-TSS (ENSMUST00000193276)	protein_coding	-172	ENSMUST00000193276	ENSMUSG00000004892	ENSMUST00000191627
155	Ocln	13	100547610	100548110	3.6	500	protein_coding-intron (ENSMUST00000022140, intron 1 of 8)	protein_coding	4600	ENSMUST00000159515	ENSMUSG00000021638	ENSMUST00000159459
156	Akr1d1	6	37537882	37538382	3.59	500	protein_coding-intron (ENSMUST00000040987, intron 3 of 8)	protein_coding	-1549	ENSMUST00000123648	ENSMUSG00000038641	ENSMUST00000123648
157	Dach1	14	98160264	98160764	3.59	500	protein_coding-intron (ENSMUST00000069334, intron 1 of 10)	protein_coding	9029	ENSMUST00000069334	ENSMUSG00000055639	ENSMUST00000069334
158	Parp14	16	35877544	35878044	3.59	500	Intergenic	protein_coding	-6250	ENSMUST00000042665	ENSMUSG00000034422	ENSMUST00000042665
159	Cenpi	X	134350195	134350695	3.56	500	protein_coding-intron (ENSMUST00000081064, intron 19 of 22)	protein_coding	3622	ENSMUST00000125604	ENSMUSG00000031262	ENSMUST00000125604
160	Fst	13	114481461	114481961	3.56	500	Intergenic	protein_coding	-22760	ENSMUST00000223640	ENSMUSG00000021765	ENSMUST00000223865
161	Gstcd	3	133071907	133072407	3.56	500	protein_coding-intron (ENSMUST00000029651, intron 3 of 11)	protein_coding	10971	ENSMUST00000197381	ENSMUSG00000028018	ENSMUST00000161577
162	Hmgcr	13	96673658	96674158	3.56	500	Intergenic	protein_coding	-2972	ENSMUST00000022176	ENSMUSG00000021670	ENSMUST00000168855
163	Pi4k2b	5	52709806	52710306	3.56	500	Intergenic	protein_coding	-31518	ENSMUST00000031081	ENSMUSG00000029186	ENSMUST00000031082
164	Gys1	7	45436208	45436708	3.56	500	protein_coding-intron (ENSMUST00000003964, intron 1 of 15)	protein_coding	1581	ENSMUST00000211150	ENSMUSG00000003865	ENSMUST00000210563
165	Limk2	11	3378242	3378742	3.56	500	protein_coding-intron (ENSMUST00000101638, intron 2 of 15)	protein_coding	-7116	ENSMUST00000101642	ENSMUSG00000020451	ENSMUST00000101642
166	Alms1	6	85570460	85570960	3.54	500	Intergenic	protein_coding	-16821	ENSMUST00000072018	ENSMUSG00000063810	ENSMUST00000072018
167	C6	15	4703046	4703546	3.54	500	Intergenic	protein_coding	-23879	ENSMUST00000162585	ENSMUSG00000022181	ENSMUST00000162585
168	Prdx6	1	161245692	161246192	3.54	500	protein_coding-intron (ENSMUST00000051925, intron 3 of 5)	protein_coding	4612	ENSMUST00000139387	ENSMUSG00000026701	ENSMUST00000130867
169	Znhit3	11	84919976	84920476	3.54	500	Intergenic	protein_coding	-3860	ENSMUST00000103195	ENSMUSG00000020526	ENSMUST00000144552
170	Dlg2	7	92293715	92294215	3.52	500	protein_coding-intron (ENSMUST00000074273, intron 14 of 22)	protein_coding	58838	ENSMUST00000208377	ENSMUSG00000052572	ENSMUST00000129818
171	Palld	8	61669666	61670166	3.52	500	protein_coding-intron (ENSMUST00000034057, intron 10 of 19)	protein_coding	-78774	ENSMUST00000121200	ENSMUSG00000058056	ENSMUST00000135439
172	Inpp5b	4	124779977	124780477	3.52	500	protein_coding-intron (ENSMUST00000094782, intron 8 of 23)	protein_coding	10899	ENSMUST00000142652	ENSMUSG00000028894	ENSMUST00000142652
173	Myo1d	11	80755611	80756111	3.52	500	protein_coding-intron (ENSMUST00000041065, intron 1 of 21)	protein_coding	24142	ENSMUST00000125944	ENSMUSG00000035441	ENSMUST00000041065
174	Cox7c	13	86058970	86059470	3.47	500	Intergenic	protein_coding	-12316	ENSMUST00000131011	ENSMUSG00000017778	ENSMUST00000017922
175	Tm4sf1	3	57293050	57293550	3.47	500	protein_coding-exon (ENSMUST00000196704, exon 1 of 2)	protein_coding	403	ENSMUST00000196704	ENSMUSG00000027800	ENSMUST00000196704
176	Megf9	4	70764609	70765109	3.45	500	Intergenic	protein_coding	-229864	ENSMUST00000037881	ENSMUSG00000039270	ENSMUST00000107359
177	Syne2	12	75981850	75982350	3.45	500	protein_coding-intron (ENSMUST00000044217, intron 53 of 115)	protein_coding	-40200	ENSMUST00000148825	ENSMUSG00000063450	ENSMUST00000143031
178	Ralgps2	1	156825557	156826057	3.4	500	protein_coding-intron (ENSMUST00000027886, intron 13 of 18)	protein_coding	5040	ENSMUST00000191503	ENSMUSG00000026594	ENSMUST00000172057
179	Hs3st3b1	11	63899805	63900305	3.39	500	protein_coding-intron (ENSMUST00000094103, intron 1 of 1)	protein_coding	22235	ENSMUST00000094103	ENSMUSG00000070407	ENSMUST00000094103
180	Nos2	11	78879479	78879979	3.37	500	Intergenic	protein_coding	-41058	ENSMUST00000018610	ENSMUSG00000020826	ENSMUST00000208783
181	Mapkapk2	1	131098748	131099248	3.35	500	Intergenic	protein_coding	-1172	ENSMUST00000016672	ENSMUSG00000016528	ENSMUST00000016672
182	Rpn1	6	88094870	88095370	3.31	500	protein_coding-intron (ENSMUST00000032143, intron 4 of 9)	protein_coding	1303	ENSMUST00000203813	ENSMUSG00000030062	ENSMUST00000204164
183	Tlr1	5	64930055	64930555	3.24	500	protein_coding-intron (ENSMUST00000059349, intron 1 of 2)	protein_coding	2456	ENSMUST00000059349	ENSMUSG00000044827	ENSMUST00000059349

## Sheet: H3K9me3
H3K9me3
	Gene.Name	Chr	Start	End	Peak.Score	Focus.Ratio.Region.Size	Detailed.Annotation	Gene.Type	Distance.to.TSS	Nearest.PromoterID	Entrez.ID	Nearest.Unigene
1	Cntn3	6	102488141	102488953	9.18	812	protein_coding-intron (ENSMUST00000203619, intron 1 of 22)	protein_coding	-23880	ENSMUST00000032159	ENSMUSG00000030075	ENSMUST00000032159
2	Macrod2	2	141566506	141567272	8.25	766	protein_coding-intron (ENSMUST00000078027, intron 6 of 17)	protein_coding	11213	ENSMUST00000138786	ENSMUSG00000068205	ENSMUST00000124403
3	Cks2	13	51638845	51639345	8.12	500	Intergenic	protein_coding	-6137	ENSMUST00000075853	ENSMUSG00000062248	ENSMUST00000075853
4	Rab32	10	10521239	10522149	7.92	910	Intergenic	protein_coding	36487	ENSMUST00000220018	ENSMUSG00000019832	ENSMUST00000220018
5	Gvin1	7	106235609	106236406	7.65	797	Intergenic	protein_coding	-20681	ENSMUST00000183409	ENSMUSG00000045868	ENSMUST00000006667
6	Chl1	6	103446818	103447554	7.58	736	Intergenic	protein_coding	-63400	ENSMUST00000203912	ENSMUSG00000030077	ENSMUST00000066905
7	Sec63	10	42776738	42777517	7.12	779	protein_coding-intron (ENSMUST00000019937, intron 1 of 20)	protein_coding	15321	ENSMUST00000144228	ENSMUSG00000019802	ENSMUST00000105496
8	Alpk1	3	127783525	127784242	6.92	717	Intergenic	protein_coding	-3356	ENSMUST00000029662	ENSMUSG00000028028	ENSMUST00000161239
9	Ica1	6	8863080	8863772	6.65	692	Intergenic	protein_coding	-84938	ENSMUST00000135113	ENSMUSG00000062995	ENSMUST00000151758
10	Adamts3	5	89952098	89952598	6.63	500	Intergenic	protein_coding	-69014	ENSMUST00000198151	ENSMUSG00000043635	ENSMUST00000198151
11	Basp1	15	25381804	25382480	6.56	676	protein_coding-intron (ENSMUST00000058845, intron 1 of 1)	protein_coding	31556	ENSMUST00000228597	ENSMUSG00000045763	ENSMUST00000228597
12	C6	15	4689696	4690196	6.52	500	Intergenic	protein_coding	-37229	ENSMUST00000162585	ENSMUSG00000022181	ENSMUST00000161997
13	Zfp114	7	24157080	24157705	6.42	625	Intergenic	protein_coding	-17668	ENSMUST00000205309	ENSMUSG00000068962	ENSMUST00000086010
14	Card11	5	140916521	140917021	6.39	500	protein_coding-intron (ENSMUST00000085786, intron 2 of 24)	protein_coding	-34566	ENSMUST00000196169	ENSMUSG00000036526	ENSMUST00000196169
15	Isoc1	18	58711757	58712385	6.32	628	Intergenic	protein_coding	52591	ENSMUST00000238139	ENSMUSG00000024601	ENSMUST00000025503
16	Esyt2	12	116329900	116330541	6.25	641	protein_coding-intron (ENSMUST00000100986, intron 6 of 21)	protein_coding	6044	ENSMUST00000220804	ENSMUSG00000021171	ENSMUST00000223150
17	Snx7	3	117841212	117841712	6.25	500	protein_coding-intron (ENSMUST00000029639, intron 2 of 8)	protein_coding	5246	ENSMUST00000198499	ENSMUSG00000028007	ENSMUST00000167877
18	Ablim1	19	57056438	57057120	6.19	682	protein_coding-intron (ENSMUST00000079360, intron 15 of 25)	protein_coding	-9541	ENSMUST00000137389	ENSMUSG00000025085	ENSMUST00000111546
19	Trem1	17	48221571	48222225	6.19	654	Intergenic	protein_coding	-10870	ENSMUST00000113251	ENSMUSG00000042265	ENSMUST00000048782
20	Gmpr	13	45499865	45500610	6.14	745	Intergenic	protein_coding	-7207	ENSMUST00000000260	ENSMUSG00000000253	ENSMUST00000129176
21	Msra	14	64366127	64366756	6.14	629	protein_coding-intron (ENSMUST00000067927, intron 6 of 10)	protein_coding	50507	ENSMUST00000210428	ENSMUSG00000054733	ENSMUST00000209513
22	Abtb2	2	103560069	103560716	6	647	Intergenic	protein_coding	-5918	ENSMUST00000076212	ENSMUSG00000032724	ENSMUST00000138580
23	Gstcd	3	133001062	133001700	6	638	protein_coding-intron (ENSMUST00000029651, intron 8 of 11)	protein_coding	4296	ENSMUST00000160402	ENSMUSG00000028018	ENSMUST00000029651
24	Schip1	3	67991681	67992388	6	707	protein_coding-intron (ENSMUST00000063263, intron 1 of 3)	protein_coding	-72768	ENSMUST00000029346	ENSMUSG00000027777	ENSMUST00000182532
25	Slc27a2	2	126570826	126571326	6	500	protein_coding-intron (ENSMUST00000061491, intron 4 of 9)	protein_coding	6316	ENSMUST00000150947	ENSMUSG00000027359	ENSMUST00000150947
26	Dlg2	7	92222001	92222677	5.99	676	protein_coding-intron (ENSMUST00000074273, intron 13 of 22)	protein_coding	-12584	ENSMUST00000138389	ENSMUSG00000052572	ENSMUST00000138389
27	Casp12	9	5460627	5461127	5.99	500	Intergenic	protein_coding	115373	ENSMUST00000151332	ENSMUSG00000025887	ENSMUST00000149520
28	Cp	3	19990342	19990986	5.92	644	protein_coding-intron (ENSMUST00000003714, intron 18 of 19)	protein_coding	1512	ENSMUST00000173779	ENSMUSG00000003617	ENSMUST00000172860
29	Aff2	X	69192280	69192780	5.85	500	Intergenic	protein_coding	-167764	ENSMUST00000033532	ENSMUSG00000031189	ENSMUST00000033532
30	Reln	5	22146939	22147439	5.85	500	protein_coding-intron (ENSMUST00000062372, intron 6 of 63)	protein_coding	-12520	ENSMUST00000162876	ENSMUSG00000042453	ENSMUST00000200318
31	Plxdc2	2	16190894	16191394	5.79	500	protein_coding-intron (ENSMUST00000146205, intron 35 of 38)	protein_coding	-165160	ENSMUST00000028081	ENSMUSG00000026748	ENSMUST00000114703
32	Epha7	4	28858453	28858953	5.72	500	protein_coding-intron (ENSMUST00000029964, intron 3 of 16)	protein_coding	-13138	ENSMUST00000129029	ENSMUSG00000028289	ENSMUST00000149030
33	Tfpi2	6	3991033	3991533	5.72	500	Intergenic	protein_coding	-2364	ENSMUST00000183682	ENSMUSG00000029664	ENSMUST00000183682
34	Tlr4	4	66877082	66877719	5.66	637	protein_coding-intron (ENSMUST00000107365, intron 2 of 3)	protein_coding	49198	ENSMUST00000147008	ENSMUSG00000039005	ENSMUST00000147008
35	Kif5c	2	49586163	49586663	5.66	500	Intergenic	protein_coding	-32885	ENSMUST00000028102	ENSMUSG00000026764	ENSMUST00000138834
36	E2f7	10	110704836	110705336	5.52	500	Intergenic	protein_coding	-40353	ENSMUST00000173294	ENSMUSG00000020185	ENSMUST00000173471
37	Dthd1	5	63135515	63136015	5.46	500	Intergenic	protein_coding	321942	ENSMUST00000170704	ENSMUSG00000090326	ENSMUST00000170704
38	Csl	10	99796356	99796856	5.45	500	lncRNA-intron (ENSMUST00000217945, intron 2 of 4)	protein_coding	-36948	ENSMUST00000056085	ENSMUSG00000046934	ENSMUST00000056085
39	Dtd1	2	144667632	144668301	5.39	669	protein_coding-intron (ENSMUST00000028917, intron 4 of 5)	protein_coding	-10132	ENSMUST00000137406	ENSMUSG00000027430	ENSMUST00000145814
40	Crem	18	3235116	3235616	5.38	500	Intergenic	protein_coding	45712	ENSMUST00000049942	ENSMUSG00000063889	ENSMUST00000154135
41	Mgst1	6	138281671	138282171	5.38	500	Intergenic	protein_coding	139067	ENSMUST00000125810	ENSMUSG00000008540	ENSMUST00000008684
42	Psma1	7	114345059	114345559	5.38	500	lncRNA-intron (ENSMUST00000163996, intron 1 of 3)	protein_coding	-69191	ENSMUST00000033008	ENSMUSG00000030751	ENSMUST00000154909
43	Aoah	13	20992075	20992575	5.31	500	protein_coding-intron (ENSMUST00000021757, intron 13 of 20)	protein_coding	-18308	ENSMUST00000222135	ENSMUSG00000021322	ENSMUST00000222135
44	B230118H07Rik	2	101605559	101606059	5.26	500	protein_coding-intron (ENSMUST00000090513, intron 2 of 6)	protein_coding	4747	ENSMUST00000136601	ENSMUSG00000027165	ENSMUST00000160722
45	Fhl4	10	85090488	85090988	5.26	500	Intergenic	protein_coding	11757	ENSMUST00000059383	ENSMUSG00000050035	ENSMUST00000216889
46	Map2k6	11	110487810	110488310	5.19	500	protein_coding-intron (ENSMUST00000020949, intron 2 of 11)	protein_coding	9021	ENSMUST00000133920	ENSMUSG00000020623	ENSMUST00000020949
47	Tm4sf1	3	57308244	57308744	5.19	500	Intergenic	protein_coding	-6506	ENSMUST00000029376	ENSMUSG00000027800	ENSMUST00000196704
48	Lrrc63	14	75090241	75090741	5.17	500	protein_coding-intron (ENSMUST00000022574, intron 8 of 9)	protein_coding	40390	ENSMUST00000022574	ENSMUSG00000021997	ENSMUST00000022574
49	Rnf144b	13	47228137	47228637	5.17	500	protein_coding-intron (ENSMUST00000068891, intron 3 of 7)	protein_coding	34562	ENSMUST00000110111	ENSMUSG00000038068	ENSMUST00000110111
50	Neil3	8	53706565	53707065	5.12	500	Intergenic	protein_coding	-67750	ENSMUST00000047768	ENSMUSG00000039396	ENSMUST00000149053
51	Gpsm2	3	108725602	108726102	5.12	500	Intergenic	protein_coding	-3543	ENSMUST00000029482	ENSMUSG00000027883	ENSMUST00000124043
52	Ttc32	12	9172333	9172833	5.12	500	Intergenic	protein_coding	142555	ENSMUST00000219470	ENSMUSG00000066637	ENSMUST00000085741
53	Ndufa4	6	11808568	11809068	5.1	500	Intergenic	protein_coding	98575	ENSMUST00000204084	ENSMUSG00000029632	ENSMUST00000031637
54	Nr4a2	2	57111513	57112013	5.1	500	protein_coding-TTS (ENSMUST00000140165)	protein_coding	1309	ENSMUST00000112627	ENSMUSG00000026826	ENSMUST00000112627
55	Pkib	10	57655748	57656248	5.06	500	protein_coding-intron (ENSMUST00000066028, intron 2 of 4)	protein_coding	5004	ENSMUST00000175852	ENSMUSG00000019876	ENSMUST00000176225
56	Tmem168	6	13581478	13581978	5.06	500	protein_coding-exon (ENSMUST00000031554, exon 5 of 5)	protein_coding	26020	ENSMUST00000127050	ENSMUSG00000029569	ENSMUST00000146139
57	Alg6	4	99728027	99728527	5.03	500	protein_coding-exon (ENSMUST00000137473, exon 3 of 3)	protein_coding	9125	ENSMUST00000124147	ENSMUSG00000073792	ENSMUST00000107004
58	Mastl	2	23151164	23151664	5.03	500	protein_coding-intron (ENSMUST00000028119, intron 1 of 11)	protein_coding	4483	ENSMUST00000136207	ENSMUSG00000026779	ENSMUST00000136207
59	Cenpw	10	30281822	30282322	4.99	500	Intergenic	protein_coding	-81512	ENSMUST00000099985	ENSMUSG00000075266	ENSMUST00000216853
60	Mbnl3	X	51178405	51178905	4.99	500	protein_coding-intron (ENSMUST00000114875, intron 1 of 6)	protein_coding	-13981	ENSMUST00000136404	ENSMUSG00000036109	ENSMUST00000041495
61	N4bp1	8	86833830	86834330	4.99	500	protein_coding-intron (ENSMUST00000209389, intron 1 of 1)	protein_coding	9965	ENSMUST00000209389	ENSMUSG00000031652	ENSMUST00000034074
62	Ccdc82	9	13272794	13273294	4.96	500	protein_coding-intron (ENSMUST00000110583, intron 7 of 8)	protein_coding	713	ENSMUST00000215778	ENSMUSG00000079084	ENSMUST00000216578
63	Gbp9	5	105071856	105072356	4.96	500	protein_coding-intron (ENSMUST00000031235, intron 1 of 9)	protein_coding	10657	ENSMUST00000199453	ENSMUSG00000029298	ENSMUST00000199453
64	Hira	16	18905809	18906309	4.92	500	protein_coding-intron (ENSMUST00000004222, intron 5 of 24)	protein_coding	-17014	ENSMUST00000140748	ENSMUSG00000022702	ENSMUST00000232419
65	Fbxo5	10	5774038	5774538	4.92	500	Intergenic	protein_coding	30312	ENSMUST00000142200	ENSMUSG00000019773	ENSMUST00000019907
66	Kctd14	7	97440823	97441323	4.92	500	Intergenic	protein_coding	-10250	ENSMUST00000206658	ENSMUSG00000051727	ENSMUST00000206658
67	Pcmtd1	1	7151617	7152117	4.92	500	TEC-exon (ENSMUST00000194854, exon 1 of 1)	protein_coding	-3000	ENSMUST00000182388	ENSMUSG00000051285	ENSMUST00000182306
68	Zfp281	1	136630310	136630810	4.92	500	protein_coding-TTS (ENSMUST00000047734)	protein_coding	5659	ENSMUST00000112046	ENSMUSG00000041483	ENSMUST00000112046
69	Dars	1	128377233	128377733	4.89	500	protein_coding-intron (ENSMUST00000027602, intron 8 of 15)	protein_coding	2004	ENSMUST00000186398	ENSMUSG00000026356	ENSMUST00000027602
70	Gria3	X	41535112	41535612	4.89	500	protein_coding-intron (ENSMUST00000076349, intron 3 of 15)	protein_coding	-74835	ENSMUST00000126843	ENSMUSG00000001986	ENSMUST00000124169
71	Mpp7	18	7389753	7390253	4.89	500	protein_coding-intron (ENSMUST00000115869, intron 12 of 16)	protein_coding	-35337	ENSMUST00000234210	ENSMUSG00000057440	ENSMUST00000234210
72	Tmx4	2	134638698	134639198	4.89	500	protein_coding-TTS (ENSMUST00000110119)	protein_coding	5093	ENSMUST00000110120	ENSMUSG00000034723	ENSMUST00000110120
73	Trim37	11	87173479	87173979	4.89	500	protein_coding-intron (ENSMUST00000041282, intron 12 of 23)	protein_coding	-12784	ENSMUST00000152637	ENSMUSG00000018548	ENSMUST00000154138
74	Gbe1	16	70473491	70473991	4.86	500	protein_coding-intron (ENSMUST00000023393, intron 7 of 16)	protein_coding	-87253	ENSMUST00000169432	ENSMUSG00000022707	ENSMUST00000169432
75	Nox1	X	134235803	134236303	4.86	500	protein_coding-intron (ENSMUST00000087541, intron 12 of 12)	protein_coding	-14097	ENSMUST00000162833	ENSMUSG00000031257	ENSMUST00000159231
76	Syne1	10	5385553	5386053	4.86	500	protein_coding-intron (ENSMUST00000041639, intron 13 of 31)	protein_coding	-17317	ENSMUST00000215887	ENSMUSG00000096054	ENSMUST00000217592
77	Fignl1	11	11793367	11793867	4.82	500	protein_coding-intron (ENSMUST00000123815, intron 1 of 2)	protein_coding	7844	ENSMUST00000123815	ENSMUSG00000035455	ENSMUST00000123815
78	Pcca	14	122592536	122593036	4.82	500	protein_coding-intron (ENSMUST00000038374, intron 6 of 23)	protein_coding	10102	ENSMUST00000177312	ENSMUSG00000041650	ENSMUST00000138836
79	Pnlip	19	58655285	58655785	4.82	500	protein_coding-intron (ENSMUST00000237451, intron 1 of 1)	protein_coding	3037	ENSMUST00000237451	ENSMUSG00000046008	ENSMUST00000237451
80	Adamts5	16	85945802	85946302	4.79	500	Intergenic	protein_coding	-44224	ENSMUST00000023611	ENSMUSG00000022894	ENSMUST00000023611
81	Kcnab1	3	65089872	65090372	4.79	500	protein_coding-intron (ENSMUST00000193778, intron 1 of 1)	protein_coding	-19262	ENSMUST00000049230	ENSMUSG00000027827	ENSMUST00000238901
82	Ugt8a	3	125869671	125870171	4.79	500	protein_coding-intron (ENSMUST00000057944, intron 5 of 5)	protein_coding	45964	ENSMUST00000198610	ENSMUSG00000032854	ENSMUST00000057944
83	Abca13	11	9260166	9260666	4.79	500	protein_coding-intron (ENSMUST00000042740, intron 7 of 61)	protein_coding	66965	ENSMUST00000151522	ENSMUSG00000004668	ENSMUST00000042740
84	Casp1	9	5222903	5223403	4.79	500	Intergenic	protein_coding	-75355	ENSMUST00000027015	ENSMUSG00000025888	ENSMUST00000238348
85	Cdk5rap2	4	70279009	70279509	4.79	500	protein_coding-intron (ENSMUST00000076541, intron 18 of 33)	protein_coding	-14579	ENSMUST00000138561	ENSMUSG00000039298	ENSMUST00000144099
86	Mast2	4	116361144	116361644	4.79	500	protein_coding-intron (ENSMUST00000003908, intron 4 of 28)	protein_coding	10338	ENSMUST00000239239	ENSMUSG00000003810	ENSMUST00000147262
87	Mcpt8	14	56086151	56086651	4.79	500	Intergenic	protein_coding	-1128	ENSMUST00000225107	ENSMUSG00000022157	ENSMUST00000015594
88	Ccdc90b	7	92562532	92563032	4.75	500	protein_coding-intron (ENSMUST00000032842, intron 1 of 8)	protein_coding	1633	ENSMUST00000153776	ENSMUSG00000030613	ENSMUST00000153776
89	Dapk2	9	66309125	66309625	4.75	500	Intergenic	protein_coding	41001	ENSMUST00000129778	ENSMUSG00000032380	ENSMUST00000034944
90	Nphp4	4	152505976	152506476	4.75	500	protein_coding-intron (ENSMUST00000056567, intron 6 of 28)	protein_coding	3312	ENSMUST00000123635	ENSMUSG00000039577	ENSMUST00000153759
91	Ssx2ip	3	146417525	146418025	4.75	500	protein_coding-exon (ENSMUST00000039021, exon 2 of 14)	protein_coding	-12754	ENSMUST00000141103	ENSMUSG00000036825	ENSMUST00000106153
92	Rab3gap1	1	127890248	127890748	4.72	500	protein_coding-intron (ENSMUST00000037649, intron 4 of 23)	protein_coding	-10415	ENSMUST00000150945	ENSMUSG00000036104	ENSMUST00000142662
93	Tshr	12	91523936	91524436	4.72	500	protein_coding-intron (ENSMUST00000021346, intron 8 of 9)	protein_coding	-13880	ENSMUST00000186437	ENSMUSG00000020963	ENSMUST00000021346
94	Myo6	9	80160827	80161327	4.72	500	Intergenic	protein_coding	-3954	ENSMUST00000035889	ENSMUSG00000033577	ENSMUST00000138650
95	4930438A08Rik	11	58259490	58259990	4.68	500	Intergenic	protein_coding	-15059	ENSMUST00000108834	ENSMUSG00000069873	ENSMUST00000208022
96	Akap9	5	4056906	4057406	4.68	500	protein_coding-intron (ENSMUST00000044492, intron 35 of 47)	protein_coding	-2094	ENSMUST00000196918	ENSMUSG00000040407	ENSMUST00000196350
97	Ccdc38	10	93545080	93545580	4.68	500	protein_coding-intron (ENSMUST00000092215, intron 1 of 15)	protein_coding	4698	ENSMUST00000092215	ENSMUSG00000036168	ENSMUST00000140460
98	Dpy30	17	74323201	74323701	4.68	500	protein_coding-intron (ENSMUST00000164832, intron 1 of 4)	protein_coding	493	ENSMUST00000164832	ENSMUSG00000024067	ENSMUST00000233059
99	Far2	6	147932814	147933314	4.68	500	Intergenic	protein_coding	-114195	ENSMUST00000032443	ENSMUSG00000030303	ENSMUST00000032443
100	Fundc1	X	17593956	17594456	4.68	500	Intergenic	protein_coding	-21881	ENSMUST00000026016	ENSMUSG00000025040	ENSMUST00000026016
101	Nipa2	7	55944998	55945498	4.68	500	protein_coding-promoter-TSS (ENSMUST00000205773)	protein_coding	-301	ENSMUST00000205773	ENSMUSG00000030452	ENSMUST00000130239
102	Rab30	7	92777103	92777603	4.68	500	protein_coding-promoter-TSS (ENSMUST00000208945)	protein_coding	-230	ENSMUST00000208945	ENSMUSG00000030643	ENSMUST00000208945
103	Tlr1	5	64929986	64930486	4.68	500	protein_coding-intron (ENSMUST00000059349, intron 1 of 2)	protein_coding	2525	ENSMUST00000059349	ENSMUSG00000044827	ENSMUST00000197886
104	Glt1d1	5	127724302	127724802	4.66	500	Intergenic	protein_coding	67519	ENSMUST00000134529	ENSMUSG00000049971	ENSMUST00000137157
105	Hcfc2	10	82705967	82706467	4.66	500	protein_coding-intron (ENSMUST00000020478, intron 3 of 14)	protein_coding	7006	ENSMUST00000162422	ENSMUSG00000020246	ENSMUST00000160845
106	Myo1b	1	51818137	51818637	4.66	500	protein_coding-intron (ENSMUST00000018561, intron 6 of 30)	protein_coding	2159	ENSMUST00000135125	ENSMUSG00000018417	ENSMUST00000114541
107	Ola1	2	73219358	73219858	4.66	500	protein_coding-promoter-TSS (ENSMUST00000133228)	protein_coding	-684	ENSMUST00000133228	ENSMUSG00000027108	ENSMUST00000133228
108	Alas2	X	150506782	150507282	4.61	500	Intergenic	protein_coding	-40343	ENSMUST00000066337	ENSMUSG00000025270	ENSMUST00000134670
109	Cry1	10	85212418	85212918	4.61	500	Intergenic	protein_coding	-27604	ENSMUST00000020227	ENSMUSG00000020038	ENSMUST00000214805
110	Depdc1b	13	108385322	108385822	4.61	500	protein_coding-intron (ENSMUST00000051594, intron 9 of 10)	protein_coding	28146	ENSMUST00000172402	ENSMUSG00000021697	ENSMUST00000171178
111	Eri1	8	35461822	35462322	4.61	500	Intergenic	protein_coding	19336	ENSMUST00000211536	ENSMUSG00000031527	ENSMUST00000033927
112	Fam111a	19	12544961	12545461	4.61	500	protein_coding-promoter-TSS (ENSMUST00000139270)	protein_coding	-529	ENSMUST00000139270	ENSMUSG00000024691	ENSMUST00000144662
113	H2-Ob	17	34230825	34231325	4.61	500	Intergenic	protein_coding	-7828	ENSMUST00000095342	ENSMUSG00000041538	ENSMUST00000173764
114	Palld	8	61737347	61737847	4.61	500	protein_coding-intron (ENSMUST00000034057, intron 2 of 19)	protein_coding	22492	ENSMUST00000121493	ENSMUSG00000058056	ENSMUST00000034057
115	Paxip1	5	27691848	27692348	4.61	500	protein_coding-intron (ENSMUST00000071500, intron 16 of 25)	protein_coding	59197	ENSMUST00000197625	ENSMUSG00000002221	ENSMUST00000002291
116	Bhlhb9	X	135813311	135813811	4.59	500	protein_coding-intron (ENSMUST00000207433, intron 1 of 10)	protein_coding	15967	ENSMUST00000207433	ENSMUSG00000072964	ENSMUST00000180025
117	Megf9	4	70645094	70645594	4.59	500	Intergenic	protein_coding	-110349	ENSMUST00000037881	ENSMUSG00000039270	ENSMUST00000037881
118	Scfd1	12	51455555	51456055	4.59	500	Intergenic	protein_coding	32875	ENSMUST00000218138	ENSMUSG00000020952	ENSMUST00000219434
119	Csrp2	10	110916006	110916506	4.59	500	Intergenic	protein_coding	-3533	ENSMUST00000020403	ENSMUSG00000020186	ENSMUST00000219188
120	Dis3	14	99081390	99081890	4.59	500	protein_coding-intron (ENSMUST00000042471, intron 15 of 20)	protein_coding	-2957	ENSMUST00000228756	ENSMUSG00000033166	ENSMUST00000228643
121	Haus8	8	71288270	71288770	4.59	500	protein_coding-intron (ENSMUST00000071935, intron 1 of 39)	protein_coding	-15586	ENSMUST00000035960	ENSMUSG00000035439	ENSMUST00000157039
122	Pdk3	X	93828903	93829403	4.59	500	protein_coding-intron (ENSMUST00000045748, intron 1 of 11)	protein_coding	3048	ENSMUST00000045748	ENSMUSG00000035232	ENSMUST00000154717
123	Rbbp7	X	162791250	162791750	4.59	500	protein_coding-intron (ENSMUST00000041370, intron 4 of 9)	protein_coding	16922	ENSMUST00000143681	ENSMUSG00000031353	ENSMUST00000138791
124	Dsp	13	38190887	38191387	4.54	500	protein_coding-intron (ENSMUST00000124830, intron 22 of 23)	protein_coding	12770	ENSMUST00000145151	ENSMUSG00000054889	ENSMUST00000145151
125	Mctp2	7	72447735	72448235	4.54	500	Intergenic	protein_coding	-141377	ENSMUST00000206755	ENSMUSG00000032776	ENSMUST00000205410
126	Phf6	X	52917227	52917727	4.54	500	protein_coding-intron (ENSMUST00000078944, intron 3 of 10)	protein_coding	5182	ENSMUST00000154864	ENSMUSG00000025626	ENSMUST00000179014
127	Rabgap1l	1	160511423	160511923	4.54	500	protein_coding-intron (ENSMUST00000028049, intron 13 of 20)	protein_coding	-57900	ENSMUST00000194696	ENSMUSG00000026721	ENSMUST00000195114
128	Arl6	16	59739235	59739735	4.52	500	protein_coding-intron (ENSMUST00000068860, intron 14 of 17)	protein_coding	-100094	ENSMUST00000099646	ENSMUSG00000022722	ENSMUST00000099646
129	Cox7c	13	86066671	86067171	4.52	500	Intergenic	protein_coding	-20017	ENSMUST00000131011	ENSMUSG00000017778	ENSMUST00000017922
130	Magi3	3	104230398	104230898	4.52	500	Intergenic	protein_coding	-10274	ENSMUST00000064371	ENSMUSG00000052539	ENSMUST00000199201
131	1110059E24Rik	19	21592377	21592877	4.52	500	protein_coding-intron (ENSMUST00000177577, intron 1 of 2)	protein_coding	11692	ENSMUST00000177605	ENSMUSG00000035171	ENSMUST00000177577
132	Arhgef12	9	43057777	43058277	4.52	500	protein_coding-intron (ENSMUST00000072767, intron 1 of 41)	protein_coding	-15395	ENSMUST00000213566	ENSMUSG00000059495	ENSMUST00000072767
133	Ccdc138	10	58494720	58495220	4.52	500	protein_coding-TTS (ENSMUST00000003310)	protein_coding	-2978	ENSMUST00000036576	ENSMUSG00000038010	ENSMUST00000036576
134	Cd83	13	43812588	43813088	4.52	500	Intergenic	protein_coding	27653	ENSMUST00000221359	ENSMUSG00000015396	ENSMUST00000221359
135	Dusp10	1	183987018	183987518	4.52	500	Intergenic	protein_coding	-26034	ENSMUST00000139839	ENSMUSG00000039384	ENSMUST00000139839
136	Gipc1	8	83648531	83649031	4.52	500	Intergenic	protein_coding	-3896	ENSMUST00000019577	ENSMUSG00000019433	ENSMUST00000211985
137	Gpr34	X	13625268	13625768	4.52	500	protein_coding-TTS (ENSMUST00000124710)	protein_coding	-6571	ENSMUST00000041708	ENSMUSG00000040229	ENSMUST00000096492
138	Luzp1	4	136529361	136529861	4.52	500	protein_coding-intron (ENSMUST00000063021, intron 1 of 3)	protein_coding	8216	ENSMUST00000063021	ENSMUSG00000001089	ENSMUST00000105849
139	Ncam1	9	49781036	49781536	4.52	500	protein_coding-intron (ENSMUST00000114476, intron 1 of 15)	protein_coding	17472	ENSMUST00000192584	ENSMUSG00000039542	ENSMUST00000217121
140	Ndufs4	13	114338928	114339428	4.52	500	protein_coding-intron (ENSMUST00000022286, intron 2 of 4)	protein_coding	48871	ENSMUST00000225707	ENSMUSG00000021764	ENSMUST00000232101
141	Snx25	8	46114672	46115172	4.52	500	protein_coding-intron (ENSMUST00000041582, intron 3 of 18)	protein_coding	1780	ENSMUST00000176410	ENSMUSG00000038291	ENSMUST00000144244
142	Zfp521	18	14013016	14013516	4.52	500	Intergenic	protein_coding	-40479	ENSMUST00000025288	ENSMUSG00000024420	ENSMUST00000234025
143	App	16	85341902	85342402	4.47	500	Intergenic	protein_coding	-168386	ENSMUST00000227723	ENSMUSG00000022892	ENSMUST00000228375
144	Atg10	13	91071871	91072371	4.47	500	protein_coding-intron (ENSMUST00000022119, intron 3 of 7)	protein_coding	53489	ENSMUST00000223729	ENSMUSG00000021619	ENSMUST00000224449
145	Chd9	8	91013046	91013546	4.47	500	protein_coding-intron (ENSMUST00000048665, intron 23 of 39)	protein_coding	21733	ENSMUST00000211552	ENSMUSG00000056608	ENSMUST00000209474
146	Hmgn2	4	133946972	133947472	4.47	500	Intergenic	protein_coding	20021	ENSMUST00000123234	ENSMUSG00000003038	ENSMUST00000100472
147	Ncald	15	37808411	37808911	4.47	500	Intergenic	protein_coding	-16091	ENSMUST00000150453	ENSMUSG00000051359	ENSMUST00000137944
148	Prune2	19	17180394	17180894	4.47	500	protein_coding-intron (ENSMUST00000087689, intron 11 of 19)	protein_coding	-27607	ENSMUST00000225838	ENSMUSG00000039126	ENSMUST00000224059
149	Thg1l	11	45963272	45963772	4.47	500	Intergenic	protein_coding	-8028	ENSMUST00000011398	ENSMUSG00000011254	ENSMUST00000133238
150	Ttk	9	83838161	83838661	4.47	500	protein_coding-TTS (ENSMUST00000189727)	protein_coding	3645	ENSMUST00000191484	ENSMUSG00000038379	ENSMUST00000186277
151	Pde4d	13	108977144	108977644	4.46	500	protein_coding-intron (ENSMUST00000122041, intron 2 of 16)	protein_coding	117228	ENSMUST00000177907	ENSMUSG00000021699	ENSMUST00000117879
152	Ccdc18	5	108172196	108172696	4.46	500	protein_coding-intron (ENSMUST00000047677, intron 12 of 28)	protein_coding	10767	ENSMUST00000195973	ENSMUSG00000056531	ENSMUST00000047677
153	Pds5b	5	150735977	150736477	4.46	500	protein_coding-intron (ENSMUST00000016569, intron 7 of 34)	protein_coding	-11595	ENSMUST00000133738	ENSMUSG00000034021	ENSMUST00000038900
154	Skap2	6	51818179	51818679	4.46	500	Intergenic	protein_coding	53500	ENSMUST00000205174	ENSMUSG00000059182	ENSMUST00000078214
155	Ufsp2	8	45986990	45987490	4.46	500	protein_coding-intron (ENSMUST00000034051, intron 7 of 11)	protein_coding	-5385	ENSMUST00000210608	ENSMUSG00000031634	ENSMUST00000210081
156	Mitf	6	98005283	98005783	4.4	500	protein_coding-intron (ENSMUST00000043628, intron 5 of 8)	protein_coding	13612	ENSMUST00000203938	ENSMUSG00000035158	ENSMUST00000203884
157	Pola1	X	93466986	93467486	4.4	500	protein_coding-intron (ENSMUST00000006856, intron 32 of 36)	protein_coding	23710	ENSMUST00000142479	ENSMUSG00000006678	ENSMUST00000006856
158	Rpl36al	12	69177448	69177948	4.4	500	protein_coding-intron (ENSMUST00000110621, intron 3 of 3)	protein_coding	6288	ENSMUST00000110620	ENSMUSG00000049751	ENSMUST00000110620
159	Tnfaip3	10	18989678	18990178	4.39	500	Intergenic	protein_coding	18917	ENSMUST00000154749	ENSMUSG00000019850	ENSMUST00000154749
160	Lzts1	8	69165577	69166077	4.39	500	protein_coding-TTS (ENSMUST00000181890)	protein_coding	16403	ENSMUST00000209353	ENSMUSG00000036306	ENSMUST00000185176
161	Mpp6	6	50196265	50196765	4.39	500	protein_coding-TTS (ENSMUST00000167063)	protein_coding	2099	ENSMUST00000167319	ENSMUSG00000038388	ENSMUST00000203415
162	Rhoh	5	65874863	65875363	4.33	500	protein_coding-intron (ENSMUST00000031106, intron 2 of 3)	protein_coding	11495	ENSMUST00000202471	ENSMUSG00000029204	ENSMUST00000202591
163	Sacs	14	61159952	61160452	4.33	500	protein_coding-intron (ENSMUST00000089394, intron 2 of 9)	protein_coding	12150	ENSMUST00000119943	ENSMUSG00000048279	ENSMUST00000119943
164	Casp4	9	5326956	5327456	4.32	500	protein_coding-TTS (ENSMUST00000163086)	protein_coding	3858	ENSMUST00000163086	ENSMUSG00000033538	ENSMUST00000160064
165	Asb4	6	5419843	5420343	4.32	500	protein_coding-intron (ENSMUST00000043294, intron 3 of 5)	protein_coding	29666	ENSMUST00000183358	ENSMUSG00000042607	ENSMUST00000043294
166	Cd59b	2	104073012	104073512	4.32	500	protein_coding-intron (ENSMUST00000090429, intron 1 of 3)	protein_coding	2196	ENSMUST00000111130	ENSMUSG00000068686	ENSMUST00000129749
167	Pnpt1	11	29057359	29057859	4.32	500	Intergenic	protein_coding	-73135	ENSMUST00000154924	ENSMUSG00000020464	ENSMUST00000131527
168	Cep57	9	13814739	13815239	4.26	500	protein_coding-intron (ENSMUST00000034398, intron 6 of 10)	protein_coding	1408	ENSMUST00000124524	ENSMUSG00000031922	ENSMUST00000150893
169	Mipep	14	60850229	60850729	4.26	500	protein_coding-intron (ENSMUST00000063562, intron 16 of 18)	protein_coding	65841	ENSMUST00000223709	ENSMUSG00000021993	ENSMUST00000224635
170	Zdhhc21	4	82851341	82851841	4.26	500	protein_coding-promoter-TSS (ENSMUST00000139401)	protein_coding	-777	ENSMUST00000139401	ENSMUSG00000028403	ENSMUST00000030110
171	Slc35f5	1	125504045	125504545	4.19	500	Intergenic	protein_coding	-56300	ENSMUST00000190037	ENSMUSG00000026342	ENSMUST00000027580
172	Cenpi	X	134327813	134328313	4.06	500	protein_coding-intron (ENSMUST00000081064, intron 9 of 22)	protein_coding	16065	ENSMUST00000144678	ENSMUSG00000031262	ENSMUST00000081064

## Sheet: H3K4me1-supertypical
H3K4me1 - enhancer
	Gene.Name	Chr	Start	End	Peak.Score	Focus.Ratio.Region.Size	Detailed.Annotation	Gene.Type	Distance.to.TSS	Nearest.PromoterID	Entrez.ID	Nearest.Unigene
1	Gfod1	13	43296629	43296951	4.93	0.681	protein_coding-intron (ENSMUST00000055341, intron 1 of 1)	protein_coding	6615	ENSMUST00000222779	ENSMUSG00000051335	ENSMUST00000222779
2	Baiap2	11	119960077	119960513	4.79	1.474	protein_coding-TTS (ENSMUST00000146960)	protein_coding	274	ENSMUST00000146960	ENSMUSG00000025372	ENSMUST00000146566
3	Lrp8	4	107806338	107806802	4.73	1.385	lncRNA-exon (ENSMUST00000097930, exon 2 of 2)	protein_coding	3702	ENSMUST00000146552	ENSMUSG00000028613	ENSMUST00000123140
4	Lhfpl2	13	94094786	94095108	4.65	1.234	protein_coding-intron (ENSMUST00000054274, intron 1 of 3)	protein_coding	486	ENSMUST00000221096	ENSMUSG00000045312	ENSMUST00000223423
5	Frmd4b	6	97278309	97278711	4.61	0.693	Intergenic	protein_coding	12751	ENSMUST00000203486	ENSMUSG00000030064	ENSMUST00000113353
6	Uba7	9	107974608	107974930	4.61	0.705	protein_coding-promoter-TSS (ENSMUST00000035216)	protein_coding	-736	ENSMUST00000176037	ENSMUSG00000032596	ENSMUST00000176037
7	Arsb	13	93758178	93758664	4.4	0.718	Intergenic	protein_coding	-13209	ENSMUST00000091403	ENSMUSG00000042082	ENSMUST00000091403
8	Muc1	3	89231740	89232235	4.38	0.667	protein_coding-TTS (ENSMUST00000146844)	protein_coding	516	ENSMUST00000139206	ENSMUSG00000042784	ENSMUST00000146844
9	Cdc6	11	98911162	98911728	4.29	0.605	protein_coding-exon (ENSMUST00000092706, exon 5 of 12)	protein_coding	3294	ENSMUST00000093937	ENSMUSG00000017499	ENSMUST00000093937
10	Rest	5	77249766	77250088	4.25	0.768	Intergenic	protein_coding	-15564	ENSMUST00000080359	ENSMUSG00000029249	ENSMUST00000113449
11	Tpi1	6	124811129	124811671	4.11	0.567	protein_coding-TTS (ENSMUST00000047760)	protein_coding	486	ENSMUST00000133251	ENSMUSG00000023456	ENSMUST00000133251
12	Irf2	8	46743024	46743346	4.1	0.428	protein_coding-intron (ENSMUST00000034041, intron 1 of 8)	protein_coding	2919	ENSMUST00000207571	ENSMUSG00000031627	ENSMUST00000210218
13	Irf8	8	120806600	120807077	4.08	0.34	protein_coding-intron (ENSMUST00000127664, intron 1 of 15)	protein_coding	54629	ENSMUST00000160594	ENSMUSG00000041515	ENSMUST00000162775
14	Mpzl3	9	45063914	45064236	4.07	0.428	protein_coding-exon (ENSMUST00000093856, exon 2 of 2)	protein_coding	4826	ENSMUST00000187113	ENSMUSG00000070305	ENSMUST00000114664
15	Calm3	7	16919882	16920348	3.96	0.428	protein_coding-intron (ENSMUST00000019514, intron 1 of 5)	protein_coding	-2912	ENSMUST00000173139	ENSMUSG00000019370	ENSMUST00000172594
16	Pkib	10	57650050	57650447	3.94	0.331	protein_coding-promoter-TSS (ENSMUST00000066028)	protein_coding	-733	ENSMUST00000066028	ENSMUSG00000019876	ENSMUST00000176225
17	Tsen15	1	152377253	152377739	3.91	0.529	protein_coding-intron (ENSMUST00000015124, intron 3 of 4)	protein_coding	-5414	ENSMUST00000161717	ENSMUSG00000014980	ENSMUST00000159270
18	Ttc3	16	94453125	94453522	3.87	0.282	protein_coding-intron (ENSMUST00000117648, intron 37 of 45)	protein_coding	2197	ENSMUST00000141192	ENSMUSG00000040785	ENSMUST00000129536
19	Arhgef7	8	11774357	11774764	3.84	0.365	protein_coding-intron (ENSMUST00000033908, intron 2 of 17)	protein_coding	-7967	ENSMUST00000211409	ENSMUSG00000031511	ENSMUST00000098938
20	Socs1	16	10774752	10775154	3.82	0.453	Intergenic	protein_coding	10583	ENSMUST00000229866	ENSMUSG00000038037	ENSMUST00000038099
21	Ankrd33b	15	31332435	31332757	3.79	0.327	protein_coding-intron (ENSMUST00000044324, intron 1 of 2)	protein_coding	-7347	ENSMUST00000227391	ENSMUSG00000022237	ENSMUST00000110410
22	Dtx4	19	12501008	12501421	3.77	0.29	protein_coding-exon (ENSMUST00000045521, exon 1 of 9)	protein_coding	240	ENSMUST00000045521	ENSMUSG00000039982	ENSMUST00000045521
23	Susd1	4	59355681	59356003	3.76	0.239	protein_coding-intron (ENSMUST00000040166, intron 10 of 16)	protein_coding	7140	ENSMUST00000136077	ENSMUSG00000038578	ENSMUST00000136562
24	4930438A08Rik	11	58289533	58289939	3.71	0.277	protein_coding-exon (ENSMUST00000108834, exon 5 of 7)	protein_coding	14676	ENSMUST00000208022	ENSMUSG00000069873	ENSMUST00000208022
25	Ifih1	2	62647211	62647663	3.66	0.214	Intergenic	protein_coding	-1182	ENSMUST00000176431	ENSMUSG00000026896	ENSMUST00000028259
26	Itpa	2	130669565	130669979	3.65	0.315	protein_coding-intron (ENSMUST00000103193, intron 1 of 7)	protein_coding	1907	ENSMUST00000126714	ENSMUSG00000074797	ENSMUST00000103193
27	Gpx3	11	54903578	54903900	3.64	0.29	protein_coding-intron (ENSMUST00000082430, intron 1 of 4)	protein_coding	813	ENSMUST00000149324	ENSMUSG00000018339	ENSMUST00000149324
28	Mmp28	11	83466996	83467318	3.64	0.302	Intergenic	protein_coding	-4086	ENSMUST00000108137	ENSMUSG00000020682	ENSMUST00000119346
29	Rad18	6	112692147	112692544	3.63	0.127	protein_coding-intron (ENSMUST00000068487, intron 2 of 13)	protein_coding	4259	ENSMUST00000113182	ENSMUSG00000030254	ENSMUST00000142079
30	Slc7a8	14	54760594	54761024	3.63	0.277	protein_coding-intron (ENSMUST00000022787, intron 1 of 10)	protein_coding	21121	ENSMUST00000022787	ENSMUSG00000022180	ENSMUST00000022787
31	Ubl5	9	20643542	20643864	3.57	0.164	protein_coding-promoter-TSS (ENSMUST00000086459)	protein_coding	-368	ENSMUST00000160682	ENSMUSG00000084786	ENSMUST00000161887
32	Uhrf1	17	56310169	56310583	3.57	0.114	protein_coding-intron (ENSMUST00000001258, intron 3 of 16)	protein_coding	-2287	ENSMUST00000137876	ENSMUSG00000001228	ENSMUST00000001258
33	Lin9	1	180662786	180663183	3.56	0.07	protein_coding-intron (ENSMUST00000085804, intron 6 of 11)	protein_coding	1507	ENSMUST00000194638	ENSMUSG00000058729	ENSMUST00000193892
34	Nrgn	9	37544010	37544412	3.56	0.227	protein_coding-TTS (ENSMUST00000002008)	protein_coding	1927	ENSMUST00000182070	ENSMUSG00000053310	ENSMUST00000182070
35	Tcp11l1	2	104691526	104691848	3.56	0.177	protein_coding-intron (ENSMUST00000028597, intron 5 of 9)	protein_coding	-7421	ENSMUST00000129571	ENSMUSG00000027175	ENSMUST00000137428
36	Dmkn	7	30781928	30782353	3.55	0.188	Intergenic	protein_coding	5739	ENSMUST00000041703	ENSMUSG00000060962	ENSMUST00000054427
37	Rps6ka4	19	6840715	6841037	3.55	0.151	protein_coding-promoter-TSS (ENSMUST00000025903)	protein_coding	-240	ENSMUST00000237442	ENSMUSG00000024952	ENSMUST00000236334
38	Copz2	11	96860657	96860979	3.54	0.151	protein_coding-intron (ENSMUST00000018816, intron 8 of 8)	protein_coding	6687	ENSMUST00000147710	ENSMUSG00000018672	ENSMUST00000155696
39	Golgb1	16	36918861	36919183	3.54	0.063	protein_coding-exon (ENSMUST00000039855, exon 13 of 21)	protein_coding	-5435	ENSMUST00000152864	ENSMUSG00000034243	ENSMUST00000140266
40	Tlr2	3	83841216	83841715	3.54	0.101	protein_coding-intron (ENSMUST00000029623, intron 1 of 2)	protein_coding	302	ENSMUST00000029623	ENSMUSG00000027995	ENSMUST00000029623
41	Cdc42bpa	1	180119173	180119570	3.53	0.078	protein_coding-TTS (ENSMUST00000152582)	protein_coding	-4395	ENSMUST00000145274	ENSMUSG00000026490	ENSMUST00000135056
42	Mapkapk3	9	107259736	107260143	3.53	0.202	protein_coding-exon (ENSMUST00000155860, exon 6 of 6)	protein_coding	1997	ENSMUST00000141674	ENSMUSG00000032577	ENSMUST00000035194
43	Psen2	1	180290810	180291132	3.51	0.163	Intergenic	protein_coding	-27533	ENSMUST00000133340	ENSMUSG00000010609	ENSMUST00000111105
44	Tpm3	3	90086437	90086842	3.51	0.214	protein_coding-promoter-TSS (ENSMUST00000133281)	protein_coding	268	ENSMUST00000149115	ENSMUSG00000027940	ENSMUST00000143281
45	Slc25a24	3	109126054	109126376	3.5	0.227	protein_coding-intron (ENSMUST00000029477, intron 1 of 9)	protein_coding	3053	ENSMUST00000140786	ENSMUSG00000040322	ENSMUST00000140786
46	B230118H07Rik	2	101581166	101581488	3.49	0.163	protein_coding-intron (ENSMUST00000090513, intron 5 of 6)	protein_coding	3607	ENSMUST00000138903	ENSMUSG00000027165	ENSMUST00000177007
47	Wee1	7	110128449	110128894	3.49	0.126	protein_coding-intron (ENSMUST00000033326, intron 5 of 10)	protein_coding	6625	ENSMUST00000033326	ENSMUSG00000031016	ENSMUST00000033326
48	Gramd1b	9	40296887	40297284	3.47	0.085	protein_coding-TTS (ENSMUST00000118159)	protein_coding	9910	ENSMUST00000155265	ENSMUSG00000040111	ENSMUST00000118159
49	Oas1g	5	120880569	120880980	3.45	0.164	protein_coding-intron (ENSMUST00000086368, intron 3 of 6)	protein_coding	-1171	ENSMUST00000161809	ENSMUSG00000066861	ENSMUST00000086368
50	AB124611	9	21529837	21530249	3.44	0.113	protein_coding-intron (ENSMUST00000076326, intron 3 of 7)	protein_coding	3815	ENSMUST00000076326	ENSMUSG00000057191	ENSMUST00000086361
51	Smtn	11	3535662	3536075	3.44	0.075	lncRNA-TTS (ENSMUST00000125275)	protein_coding	1530	ENSMUST00000110011	ENSMUSG00000020439	ENSMUST00000136243
52	Ttf2	3	100973242	100973564	3.41	0.101	Intergenic	protein_coding	-3740	ENSMUST00000076941	ENSMUSG00000033222	ENSMUST00000151697
53	Il12rb1	8	70811061	70811383	3.4	0.189	protein_coding-TTS (ENSMUST00000212146)	protein_coding	-1118	ENSMUST00000212251	ENSMUSG00000000791	ENSMUST00000212146
54	N4bp1	8	86851585	86851907	3.39	0.189	protein_coding-exon (ENSMUST00000210029, exon 1 of 3)	protein_coding	674	ENSMUST00000210029	ENSMUSG00000031652	ENSMUST00000034074
55	Pdlim4	11	54053334	54053738	3.39	0.189	Intergenic	protein_coding	11032	ENSMUST00000151948	ENSMUSG00000020388	ENSMUST00000093109
56	Lman1	18	66027161	66027558	3.38	0.056	Intergenic	protein_coding	-4779	ENSMUST00000143990	ENSMUSG00000041891	ENSMUST00000155895
57	Rttn	18	88990255	88990652	3.38	0.056	protein_coding-TTS (ENSMUST00000235314)	protein_coding	4559	ENSMUST00000235314	ENSMUSG00000023066	ENSMUST00000236313
58	Ndufs3	2	90896270	90896722	3.38	0.114	protein_coding-intron (ENSMUST00000005647, intron 6 of 6)	protein_coding	1958	ENSMUST00000140248	ENSMUSG00000005510	ENSMUST00000152059
59	Tmem106a	11	101584198	101584520	3.38	0.151	protein_coding-intron (ENSMUST00000039581, intron 3 of 8)	protein_coding	-1638	ENSMUST00000128659	ENSMUSG00000034947	ENSMUST00000128614
60	Panx1	9	15042809	15043131	3.35	0.189	protein_coding-intron (ENSMUST00000056755, intron 1 of 3)	protein_coding	827	ENSMUST00000169288	ENSMUSG00000031934	ENSMUST00000056755
61	Btbd16	7	130782741	130783138	3.33	0.049	protein_coding-intron (ENSMUST00000048453, intron 3 of 15)	protein_coding	8772	ENSMUST00000208593	ENSMUSG00000040298	ENSMUST00000208593
62	Pdcd10	3	75526782	75527179	3.32	0.049	protein_coding-intron (ENSMUST00000029424, intron 5 of 7)	protein_coding	-5410	ENSMUST00000160196	ENSMUSG00000027835	ENSMUST00000029424
63	Mlec	5	115167132	115167454	3.32	0.088	Intergenic	protein_coding	-9114	ENSMUST00000112121	ENSMUSG00000048578	ENSMUST00000124678
64	Ezh2	6	47573363	47573760	3.31	0.028	protein_coding-intron (ENSMUST00000081721, intron 3 of 19)	protein_coding	4099	ENSMUST00000092648	ENSMUSG00000029687	ENSMUST00000081721
65	Pi4k2b	5	52759368	52759765	3.3	0.049	protein_coding-intron (ENSMUST00000031081, intron 7 of 9)	protein_coding	4964	ENSMUST00000145825	ENSMUSG00000029186	ENSMUST00000031081
66	Sertad2	11	20631348	20631670	3.29	0.063	protein_coding-promoter-TSS (ENSMUST00000109586)	protein_coding	-470	ENSMUST00000109586	ENSMUSG00000049800	ENSMUST00000109585
67	Slco4a1	2	180456237	180456646	3.29	0.063	protein_coding-intron (ENSMUST00000038259, intron 1 of 11)	protein_coding	107	ENSMUST00000139902	ENSMUSG00000038963	ENSMUST00000128367
68	Ube2c	2	164773254	164773576	3.29	0.05	protein_coding-TTS (ENSMUST00000088248)	protein_coding	3512	ENSMUST00000001439	ENSMUSG00000001403	ENSMUST00000001439
69	Coro7	16	4666712	4667120	3.28	0.202	protein_coding-intron (ENSMUST00000038552, intron 6 of 27)	protein_coding	-4994	ENSMUST00000130125	ENSMUSG00000039637	ENSMUST00000143723
70	Nfkbia	12	55457054	55457376	3.28	0.177	Intergenic	protein_coding	34595	ENSMUST00000219869	ENSMUSG00000021025	ENSMUST00000219869
71	Rhou	8	123663607	123664058	3.27	0.189	protein_coding-TTS (ENSMUST00000045487)	protein_coding	9903	ENSMUST00000045487	ENSMUSG00000039960	ENSMUST00000136615
72	Rhobtb1	10	69213593	69213915	3.26	0.113	protein_coding-promoter-TSS (ENSMUST00000170048)	protein_coding	560	ENSMUST00000067908	ENSMUSG00000019944	ENSMUST00000164876
73	Adam3	8	24689776	24690173	3.25	0.056	protein_coding-intron (ENSMUST00000033958, intron 16 of 21)	protein_coding	-2011	ENSMUST00000167431	ENSMUSG00000031553	ENSMUST00000167703
74	Syne1	10	5490634	5491031	3.25	0.056	protein_coding-intron (ENSMUST00000041639, intron 2 of 31)	protein_coding	59846	ENSMUST00000215295	ENSMUSG00000096054	ENSMUST00000215467
75	Asf1b	8	83967756	83968078	3.25	0.101	protein_coding-TTS (ENSMUST00000124913)	protein_coding	2870	ENSMUST00000124174	ENSMUSG00000005470	ENSMUST00000005607
76	Dctd	8	48111357	48111754	3.24	0.028	protein_coding-intron (ENSMUST00000033966, intron 1 of 5)	protein_coding	1344	ENSMUST00000174379	ENSMUSG00000031562	ENSMUST00000174379
77	Cdca7	2	72509349	72509751	3.23	0.151	Intergenic	protein_coding	24443	ENSMUST00000137880	ENSMUSG00000055612	ENSMUST00000127344
78	Dgcr6	16	18065495	18065898	3.23	0.138	protein_coding-promoter-TSS (ENSMUST00000066027)	protein_coding	537	ENSMUST00000076757	ENSMUSG00000003531	ENSMUST00000143343
79	Shb	4	45529718	45530040	3.23	0.151	protein_coding-exon (ENSMUST00000061986, exon 1 of 6)	protein_coding	451	ENSMUST00000061986	ENSMUSG00000044813	ENSMUST00000146236
80	Sco1	11	67055295	67055692	3.22	0.07	protein_coding-intron (ENSMUST00000092996, intron 2 of 5)	protein_coding	1718	ENSMUST00000136984	ENSMUSG00000069844	ENSMUST00000108690
81	Tnr	1	159790848	159791245	3.22	0.056	protein_coding-intron (ENSMUST00000111669, intron 1 of 21)	protein_coding	17276	ENSMUST00000193325	ENSMUSG00000015829	ENSMUST00000192457
82	Gnptab	10	88422004	88422326	3.21	0.101	protein_coding-intron (ENSMUST00000020251, intron 7 of 20)	protein_coding	-7401	ENSMUST00000132738	ENSMUSG00000035311	ENSMUST00000130301
83	Arf3	15	98763670	98763992	3.2	0.101	protein_coding-promoter-TSS (ENSMUST00000053183)	protein_coding	-617	ENSMUST00000129354	ENSMUSG00000051853	ENSMUST00000129354
84	Insig1	5	28118594	28118916	3.18	0.114	Intergenic	protein_coding	44089	ENSMUST00000199728	ENSMUSG00000045294	ENSMUST00000059155
85	S1pr2	9	20972437	20972759	3.18	0.151	protein_coding-intron (ENSMUST00000054197, intron 1 of 1)	protein_coding	1380	ENSMUST00000216499	ENSMUSG00000043895	ENSMUST00000214333
86	Snd1	6	28667801	28668198	3.17	0.035	protein_coding-intron (ENSMUST00000001460, intron 11 of 23)	protein_coding	-36910	ENSMUST00000163772	ENSMUSG00000001424	ENSMUST00000165151
87	AI413582	17	27566378	27566700	3.17	0.126	protein_coding-promoter-TSS (ENSMUST00000080190)	protein_coding	-783	ENSMUST00000154473	ENSMUSG00000062753	ENSMUST00000145183
88	Nos2	11	78920960	78921282	3.17	0.075	protein_coding-intron (ENSMUST00000018610, intron 1 of 26)	protein_coding	334	ENSMUST00000018610	ENSMUSG00000020826	ENSMUST00000214397
89	Celsr1	15	86034489	86034811	3.15	0.101	protein_coding-promoter-TSS (ENSMUST00000016172)	protein_coding	-873	ENSMUST00000016172	ENSMUSG00000016028	ENSMUST00000227450
90	Cflar	1	58748455	58748860	3.15	0.101	protein_coding-intron (ENSMUST00000069333, intron 8 of 9)	protein_coding	18105	ENSMUST00000123032	ENSMUSG00000026031	ENSMUST00000156870
91	Dlg2	7	92191159	92191556	3.14	0.007	protein_coding-intron (ENSMUST00000074273, intron 13 of 22)	protein_coding	10576	ENSMUST00000207798	ENSMUSG00000052572	ENSMUST00000239136
92	Snx25	8	46150095	46150417	3.14	0.075	protein_coding-intron (ENSMUST00000041582, intron 1 of 18)	protein_coding	1449	ENSMUST00000041582	ENSMUSG00000038291	ENSMUST00000144244
93	Oas3	5	120759056	120759453	3.12	0.028	protein_coding-intron (ENSMUST00000044833, intron 11 of 15)	protein_coding	-1599	ENSMUST00000200795	ENSMUSG00000032661	ENSMUST00000044833
94	Slc31a2	4	62259659	62260056	3.12	0.028	Intergenic	protein_coding	-2705	ENSMUST00000107468	ENSMUSG00000066152	ENSMUST00000107467
95	Snrnp35	5	124490437	124490841	3.08	0.101	protein_coding-TTS (ENSMUST00000136567)	protein_coding	7181	ENSMUST00000111453	ENSMUSG00000029402	ENSMUST00000111453
96	Igf2bp3	6	49093118	49093515	3.07	0.049	protein_coding-exon (ENSMUST00000203544, exon 10 of 10)	protein_coding	895	ENSMUST00000205057	ENSMUSG00000029814	ENSMUST00000205057
97	Atm	9	53499063	53499460	3.06	0.056	protein_coding-intron (ENSMUST00000118282, intron 19 of 61)	protein_coding	34705	ENSMUST00000118282	ENSMUSG00000034218	ENSMUST00000232179
98	Mogat2	7	99238812	99239134	3.06	0.126	protein_coding-promoter-TSS (ENSMUST00000064231)	protein_coding	-354	ENSMUST00000064231	ENSMUSG00000052396	ENSMUST00000064231
99	Srsf3	17	29044664	29045067	3.06	0.126	Intergenic	protein_coding	5171	ENSMUST00000233105	ENSMUSG00000071172	ENSMUST00000233885
100	Clic5	17	44173044	44173447	3.05	0.063	protein_coding-intron (ENSMUST00000239215, intron 1 of 5)	protein_coding	-15339	ENSMUST00000024755	ENSMUSG00000023959	ENSMUST00000239215
101	Kctd1	18	15048028	15048475	3.04	0.063	lncRNA-TTS (ENSMUST00000234445)	protein_coding	13638	ENSMUST00000234685	ENSMUSG00000036225	ENSMUST00000233993
102	Pgap2	7	102236538	102236860	3.04	0.05	protein_coding-TTS (ENSMUST00000126914)	protein_coding	796	ENSMUST00000134621	ENSMUSG00000030990	ENSMUST00000120119
103	Atg10	13	91029396	91029793	3.01	0.056	protein_coding-intron (ENSMUST00000022119, intron 4 of 7)	protein_coding	96016	ENSMUST00000223729	ENSMUSG00000021619	ENSMUST00000223729
104	Gbp4	5	105152445	105152842	3.01	0.056	Intergenic	protein_coding	-13057	ENSMUST00000100962	ENSMUSG00000079363	ENSMUST00000196677
105	Dhrs3	4	144929505	144929827	3.01	0.05	Intergenic	protein_coding	10787	ENSMUST00000133265	ENSMUSG00000066026	ENSMUST00000128926

## Sheet: H3K4me1-super
H3K4me1 - super enhancer
	Gene.Name	Chr	Start	End	Peak.Score	Focus.Ratio.Region.Size	Detailed.Annotation	Gene.Type	Distance.to.TSS	Nearest.PromoterID	Entrez.ID	Nearest.Unigene
1	Cars	7	143593396	143601472	24.8	63.135	protein_coding-promoter-TSS (ENSMUST00000154022)	protein_coding	-682	ENSMUST00000154022	ENSMUSG00000010755	ENSMUST00000105909
2	Tnnt1	7	4508146	4518601	22.3	58.867	protein_coding-TTS (ENSMUST00000163560)	protein_coding	995	ENSMUST00000166161	ENSMUSG00000064179	ENSMUST00000168111
3	Arhgef10	8	14979323	14989576	21.2	53.178	protein_coding-intron (ENSMUST00000084207, intron 26 of 28)	protein_coding	-5910	ENSMUST00000162444	ENSMUSG00000071176	ENSMUST00000163062
4	Paqr4	17	23733625	23742277	15.1	14.039	protein_coding-TTS (ENSMUST00000233776)	protein_coding	2447	ENSMUST00000024702	ENSMUSG00000023909	ENSMUST00000233776
5	Capn5	7	98175229	98180549	14.6	10.418	protein_coding-intron (ENSMUST00000040971, intron 1 of 12)	protein_coding	385	ENSMUST00000040971	ENSMUSG00000035547	ENSMUST00000040971
6	Gpc1	1	92831914	92835167	14.2	10.515	protein_coding-intron (ENSMUST00000045970, intron 1 of 8)	protein_coding	1571	ENSMUST00000191373	ENSMUSG00000034220	ENSMUST00000045970
7	Pcp4l1	1	171189673	171196504	12.9	13.053	protein_coding-intron (ENSMUST00000111332, intron 1 of 2)	protein_coding	3180	ENSMUST00000111332	ENSMUSG00000038370	ENSMUST00000111332
8	Prdx5	19	6906941	6910730	11.9	12.997	protein_coding-promoter-TSS (ENSMUST00000088257)	protein_coding	-534	ENSMUST00000149261	ENSMUSG00000024953	ENSMUST00000025904
9	BC051142	17	34443659	34449828	11.2	11.581	protein_coding-intron (ENSMUST00000078615, intron 11 of 19)	protein_coding	-1577	ENSMUST00000097348	ENSMUSG00000057246	ENSMUST00000097348
10	Pomp	5	147840323	147845124	9.47	7.233	Intergenic	protein_coding	-17738	ENSMUST00000031654	ENSMUSG00000029649	ENSMUST00000202621
11	Naa40	19	7229653	7235972	8.95	8.354	protein_coding-intron (ENSMUST00000025675, intron 3 of 7)	protein_coding	8222	ENSMUST00000236628	ENSMUSG00000024764	ENSMUST00000236769
12	Zbtb8os	4	129345204	129346571	7.1	6.306	protein_coding-intron (ENSMUST00000106047, intron 5 of 5)	protein_coding	1947	ENSMUST00000140272	ENSMUSG00000057572	ENSMUST00000119480
13	Xrcc3	12	111810652	111811537	6.63	3.213	protein_coding-TTS (ENSMUST00000133679)	protein_coding	1107	ENSMUST00000127281	ENSMUSG00000021287	ENSMUST00000127281
14	Hic2	16	17238524	17248631	6.47	3.505	protein_coding-intron (ENSMUST00000090190, intron 1 of 2)	protein_coding	9913	ENSMUST00000232082	ENSMUSG00000050240	ENSMUST00000090190
15	Ctdspl	9	119036634	119037373	5.81	4.889	protein_coding-intron (ENSMUST00000073109, intron 6 of 7)	protein_coding	4002	ENSMUST00000174132	ENSMUSG00000047409	ENSMUST00000073109
16	Mlh1	9	111250318	111250999	5.61	34.015	protein_coding-intron (ENSMUST00000035079, intron 9 of 18)	protein_coding	-2913	ENSMUST00000123713	ENSMUSG00000032498	ENSMUST00000123869
17	Schip1	3	68494894	68495617	5.55	3.249	protein_coding-exon (ENSMUST00000029346, exon 2 of 8)	protein_coding	1047	ENSMUST00000182719	ENSMUSG00000027777	ENSMUST00000170788
18	Cbx1	11	96791581	96792508	5.36	2.582	protein_coding-intron (ENSMUST00000018810, intron 1 of 3)	protein_coding	2795	ENSMUST00000079702	ENSMUSG00000018666	ENSMUST00000079702
19	Ifih1	2	62620013	62620525	4.94	2.561	protein_coding-intron (ENSMUST00000028259, intron 4 of 15)	protein_coding	19204	ENSMUST00000176388	ENSMUSG00000026896	ENSMUST00000176388
